# Supplementary material
Source: publisher figshare collection journal article supplement (https://acs.figshare.com/ndownloader/files/22768724)
Supplement: Supplementary file 1 [file 22768724]

## Sheet: S1
Supplemental Table S1: FPOP-cPILOT labeling scheme.
Sample ID	Sample type	DM Label	TMT-10plex Tag
9	Biological Replicate 2 FPOP Sample 1 (+ peroxide, + laser)	Light	126
13	Biological Replicate 3 Worms 1 (no peroxide, no laser)	Light	127n
17	Biological Replicate 3 FPOP Control 1 (+ peroxide, no laser)	Light	127c
16	Biological Replicate 3 FPOP Sample 1 (+ peroxide, + laser)	Light	128n
8	Biological Replicate 2 Worms 2 (no peroxide, no laser)	Light	128c
4	Biological Replicate 1 FPOP Sample 2 (+ peroxide, + laser)	Light	129n
12	Biological Replicate 2 FPOP Control 2 (+ peroxide, no laser)	Light	129c
1	Biological Replicate 1 Worms 1 (no peroxide, no laser)	Light	130n
3	Biological Replicate 1 FPOP Sample 1 (+ peroxide, + laser)	Light	130c
19	all	Light	131
11	Biological Replicate 2 FPOP Control 1 (+ peroxide, no laser)	Heavy	126
2	Biological Replicate 1 Worms 2 (no peroxide, no laser)	Heavy	127n
15	Biological Replicate 3 FPOP Sample 1 (+ peroxide, + laser)	Heavy	127c
6	Biological Replicate 1 FPOP Control 2 (+ peroxide, no laser)	Heavy	128n
18	Biological Replicate 3 FPOP Control 2 (+ peroxide, no laser)	Heavy	128c
10	Biological Replicate 2 FPOP Sample 2 (+ peroxide, + laser)	Heavy	129n
14	Biological Replicate 3 Worms 2 (no peroxide, no laser)	Heavy	129c
5	Biological Replicate 1 FPOP Control 1 (+ peroxide, no laser)	Heavy	130n
7	Biological Replicate 2 Worms 1 (no peroxide, no laser)	Heavy	130c
20	all	Heavy	131

## Sheet: S2
Supplemental Table S2: Protein and peptide identification/quantification results of a FPOP-cPILOT experiment.
	Protein Groups	Protein Groups (10 channels, %)a	R (%)b	K (%)c	TMT-K (%)d
Light DM	2334	1553 (66.5%)	18322 (20.7)	69393 (78.4)	67811 (97.7)
Heavy DM	2193	1426 (65.0%)	17652 (19.2)	73398 (79.7)	71726 (97.7)
a The number and percentage of proteins quantified across all reporter ion channels (i.e. 126-131). bThe number and percentage of peptides ending with arginine. cThe number and percentage of peptides ending with lysine. dThe number and percentage of lysine ending peptides labeled with TMT-10plex.

## Sheet: S3
Supplemental Table S3: Biological replicate 1 common IV-FPOP oxidatively modified peptides and residues.
Acession Number	Protein Name	Gene	Label-free			cPILOT
			Peptide Sequence Oxidized	Residue Oxidized	m/z	Peptide Sequence Oxidized	Residue Oxidized	m/z
P49196	40S ribosomal protein S12	rps-12	LVETLCAEHQIPLIK	C6	877.972	AILTDYFASK	A1	701.395
			LVETLCAEHQIPLIK	L1; E3; L5	877.972	LVETLCAEHQIPLIK	E3; L5	647.018
						LVETLCAEHQIPLIK	E3; L5	676.423
						LVETLCAEHQIPLIK	H9; Q10; I11	1006.57
						LVETLCAEHQIPLIK	E8; H9; I11	1006.57
						LVETLCAEHQIPLIK	E8; H9; I11	826.449
						LVETLCAEHQIPLIK	E8; H9; I11	1006.57
						LVETLCAEHQIPLIK	E8; H9; I11	609.7
						LVETLCAEHQIPLIK	E8; H9; I11	1006.57
						LVETLCAEHQIPLIK	A7; H9; I11	1006.57
						LVETLCAEHQIPLIK	A7; H9; I11	826.449
						LVETLCAEHQIPLIK	A7; H9; I11	1006.57
						LVETLCAEHQIPLIK	A7; H9; I11	609.7
						LVETLCAEHQIPLIK	A7; H9; I11	1006.57
						LVETLCAEHQIPLIK	L1; E3; A7	662.359
						LVETLCAEHQIPLIK	C6	1006.57
						LVETLCAEHQIPLIK	C6	826.449
						LVETLCAEHQIPLIK	C6	647.018
						LVETLCAEHQIPLIK	C6	676.423
						LVETLCAEHQIPLIK	C6	1006.57
						LVETLCAEHQIPLIK	C6	671.381
						LVETLCAEHQIPLIK	C6	609.7
						LVETLCAEHQIPLIK	C6	662.359
						LVETLCAEHQIPLIK	C6	1006.57
						LVETLCAEHQIPLIK	E3; L5; A7	609.7
						LVETLCAEHQIPLIK	E3; L5; A7	1006.57
P51404	40S ribosomal protein S13	rps-13	GMAPELPEDLYHLVK	M2	576.627	GMAPELPEDLYHLVK	M2	662.357
			MTAEEVQDQIVK	M1	703.846	GMAPELPEDLYHLVK	M2	662.359
			MTAEEVQDQIVK	M1	703.848	GMAPELPEDLYHLVK	M2	689.388
			MTAEEVQDQIVK	M1	703.846	GMAPELPEDLYHLVK	M2	662.358
						GMAPELPEDLYHLVK	M2	662.359
						GMAPELPEDLYHLVK	M2	558.664
						GMAPELPEDLYHLVK	M2	848.463
						GMAPELPEDLYHLVK	M2	662.359
						GMAPELPEDLYHLVK	M2	751.029
						GMAPELPEDLYHLVK	M2	662.359
						GMAPELPEDLYHLVK	M2	662.359
						GMAPELPEDLYHLVK	M2	662.359
						GMAPELPEDLYHLVK	M2	662.36
						GMAPELPEDLYHLVK	M2	662.358
						GMAPELPEDLYHLVK	M2	662.358
						GMAPELPEDLYHLVK	M2	662.359
						GMAPELPEDLYHLVKK	M2	586.335
						GMAPELPEDLYHLVKK	M2	647.018
						GMAPELPEDLYHLVKK	M2	586.334
						GMAPELPEDLYHLVKK	M2	586.336
						MTAEEVQDQIVK	M1	832.442
						MTAEEVQDQIVK	M1	832.442
						MTAEEVQDQIVK	M1	832.442
						MTAEEVQDQIVK	M1	832.441
						MTAEEVQDQIVK	M1	832.443
						MTAEEVQDQIVK	M1	625.693
						MTAEEVQDQIVK	M1	832.443
						MTAEEVQDQIVK	M1	746.404
						MTAEEVQDQIVK	M1	625.692
						MTAEEVQDQIVK	M1	832.442
						MTAEEVQDQIVK	M1	832.445
						MTAEEVQDQIVK	M1	832.443
						MTAEEVQDQIVK	M1	832.442
O01692	40S ribosomal protein S17	rps-17	DNYMPEISTVDPSQLTSIK	M4	1077.52	DNYMPEISTVDPSQLTSIK	N2; M4	1214.12
			DNYMPEISTVDPSQLTSIK	M4	1077.52	DNYMPEISTVDPSQLTSIK	Y3; M4	1214.12
			DNYMPEISTVDPSQLTSIK	M4	718.681	DNYMPEISTVDPSQLTSIK	P5	804.413
			IAGYITHLMR	L8	595.822	DNYMPEISTVDPSQLTSIK	P5	804.411
			IAGYITHLMR	L8	595.823	DNYMPEISTVDPSQLTSIK	P5	750.42
			IAGYITHLMR	M9	595.822	DNYMPEISTVDPSQLTSIK	P5	804.414
			IAGYITHLMR	M9	595.823	DNYMPEISTVDPSQLTSIK	P5	804.413
						DNYMPEISTVDPSQLTSIK	D1	804.413
						DNYMPEISTVDPSQLTSIK	D1	804.411
						DNYMPEISTVDPSQLTSIK	D1	1206.12
						DNYMPEISTVDPSQLTSIK	D1	804.413
						DNYMPEISTVDPSQLTSIK	D1	1206.11
						DNYMPEISTVDPSQLTSIK	D1	804.411
						DNYMPEISTVDPSQLTSIK	D1	804.413
						DNYMPEISTVDPSQLTSIK	N2	804.413
						DNYMPEISTVDPSQLTSIK	N2	804.411
						DNYMPEISTVDPSQLTSIK	N2	1206.12
						DNYMPEISTVDPSQLTSIK	N2	804.413
						DNYMPEISTVDPSQLTSIK	N2	1206.11
						DNYMPEISTVDPSQLTSIK	N2	804.412
						DNYMPEISTVDPSQLTSIK	N2	804.414
						DNYMPEISTVDPSQLTSIK	N2	804.413
						DNYMPEISTVDPSQLTSIK	D1; M4	1214.12
						DNYMPEISTVDPSQLTSIK	N2; Y3	1214.12
						DNYMPEISTVDPSQLTSIK	D1; Y3	1214.12
						DNYMPEISTVDPSQLTSIK	Y3	804.412
						DNYMPEISTVDPSQLTSIK	Y3	804.413
						DNYMPEISTVDPSQLTSIK	Y3	804.411
						DNYMPEISTVDPSQLTSIK	Y3	1206.12
						DNYMPEISTVDPSQLTSIK	Y3	804.413
						DNYMPEISTVDPSQLTSIK	Y3	1206.11
						DNYMPEISTVDPSQLTSIK	Y3	804.411
						DNYMPEISTVDPSQLTSIK	Y3	1214.12
						DNYMPEISTVDPSQLTSIK	Y3	804.412
						DNYMPEISTVDPSQLTSIK	Y3	750.42
						DNYMPEISTVDPSQLTSIK	Y3	804.414
						DNYMPEISTVDPSQLTSIK	Y3	804.413
						DNYMPEISTVDPSQLTSIK	E6	804.412
						DNYMPEISTVDPSQLTSIK	E6	804.413
						DNYMPEISTVDPSQLTSIK	E6	804.413
						DNYMPEISTVDPSQLTSIK	E6	804.411
						DNYMPEISTVDPSQLTSIK	E6	804.413
						DNYMPEISTVDPSQLTSIK	I7	804.412
						DNYMPEISTVDPSQLTSIK	I7	804.411
						DNYMPEISTVDPSQLTSIK	I7	804.414
						DNYMPEISTVDPSQLTSIK	M4	804.412
						DNYMPEISTVDPSQLTSIK	M4	804.413
						DNYMPEISTVDPSQLTSIK	M4	804.411
						DNYMPEISTVDPSQLTSIK	M4	1206.12
						DNYMPEISTVDPSQLTSIK	M4	804.413
						DNYMPEISTVDPSQLTSIK	M4	1206.11
						DNYMPEISTVDPSQLTSIK	M4	804.411
						DNYMPEISTVDPSQLTSIK	M4	804.412
						DNYMPEISTVDPSQLTSIK	M4	750.42
						DNYMPEISTVDPSQLTSIK	M4	804.414
						DNYMPEISTVDPSQLTSIK	M4	804.413
						RDNYMPEISTVDPSQLTSIK	N3	856.446
						RDNYMPEISTVDPSQLTSIK	N3	848.161
						RDNYMPEISTVDPSQLTSIK	N3	856.447
						RDNYMPEISTVDPSQLTSIK	N3	856.447
						RDNYMPEISTVDPSQLTSIK	N3	856.445
						RDNYMPEISTVDPSQLTSIK	N3	856.447
						RDNYMPEISTVDPSQLTSIK	N3	856.446
						RDNYMPEISTVDPSQLTSIK	N3	856.448
						RDNYMPEISTVDPSQLTSIK	N3	856.446
						RDNYMPEISTVDPSQLTSIK	N3	571.326
						RDNYMPEISTVDPSQLTSIK	N3	732.911
						RDNYMPEISTVDPSQLTSIK	R1	856.446
						RDNYMPEISTVDPSQLTSIK	R1	848.161
						RDNYMPEISTVDPSQLTSIK	R1	856.447
						RDNYMPEISTVDPSQLTSIK	R1	856.447
						RDNYMPEISTVDPSQLTSIK	R1	856.445
						RDNYMPEISTVDPSQLTSIK	R1	856.447
						RDNYMPEISTVDPSQLTSIK	R1	856.446
						RDNYMPEISTVDPSQLTSIK	R1	856.448
						RDNYMPEISTVDPSQLTSIK	R1	856.446
						RDNYMPEISTVDPSQLTSIK	R1	571.326
						RDNYMPEISTVDPSQLTSIK	R1	732.911
						RDNYMPEISTVDPSQLTSIK	P6	856.446
						RDNYMPEISTVDPSQLTSIK	P6	856.447
						RDNYMPEISTVDPSQLTSIK	P6	856.445
						RDNYMPEISTVDPSQLTSIK	P6	856.446
						RDNYMPEISTVDPSQLTSIK	E7	856.447
						RDNYMPEISTVDPSQLTSIK	E7	856.446
						RDNYMPEISTVDPSQLTSIK	Y4	856.446
						RDNYMPEISTVDPSQLTSIK	Y4	848.161
						RDNYMPEISTVDPSQLTSIK	Y4	856.447
						RDNYMPEISTVDPSQLTSIK	Y4	856.447
						RDNYMPEISTVDPSQLTSIK	Y4	856.445
						RDNYMPEISTVDPSQLTSIK	Y4	856.447
						RDNYMPEISTVDPSQLTSIK	Y4	856.446
						RDNYMPEISTVDPSQLTSIK	Y4	856.448
						RDNYMPEISTVDPSQLTSIK	Y4	856.446
						RDNYMPEISTVDPSQLTSIK	Y4	571.326
						RDNYMPEISTVDPSQLTSIK	Y4	732.911
						RDNYMPEISTVDPSQLTSIK	D2	856.446
						RDNYMPEISTVDPSQLTSIK	D2	848.161
						RDNYMPEISTVDPSQLTSIK	D2	856.447
						RDNYMPEISTVDPSQLTSIK	D2	856.447
						RDNYMPEISTVDPSQLTSIK	D2	856.445
						RDNYMPEISTVDPSQLTSIK	D2	856.447
						RDNYMPEISTVDPSQLTSIK	D2	856.446
						RDNYMPEISTVDPSQLTSIK	D2	856.448
						RDNYMPEISTVDPSQLTSIK	D2	856.446
						RDNYMPEISTVDPSQLTSIK	D2	571.326
						RDNYMPEISTVDPSQLTSIK	D2	732.911
						RDNYMPEISTVDPSQLTSIK	M5	856.446
						RDNYMPEISTVDPSQLTSIK	M5	848.161
						RDNYMPEISTVDPSQLTSIK	M5	856.447
						RDNYMPEISTVDPSQLTSIK	M5	856.447
						RDNYMPEISTVDPSQLTSIK	M5	856.445
						RDNYMPEISTVDPSQLTSIK	M5	856.447
						RDNYMPEISTVDPSQLTSIK	M5	856.446
						RDNYMPEISTVDPSQLTSIK	M5	856.448
						RDNYMPEISTVDPSQLTSIK	M5	856.446
						RDNYMPEISTVDPSQLTSIK	M5	571.326
						RDNYMPEISTVDPSQLTSIK	M5	732.911
P52821	40S ribosomal protein S25	rps-25	LNNMVLFDQATYDK	M4	844.406	DKLNNMVLFDQATYDK	M6	730.044
						DKLNNMVLFDQATYDK	M6	806.433
						DKLNNMVLFDQATYDK	M6	806.431
						DKLNNMVLFDQATYDK	M6	806.431
						DKLNNMVLFDQATYDK	M6	806.431
						DKLNNMVLFDQATYDK	M6	806.432
						DKLNNMVLFDQATYDK	M6	806.43
						DKLNNMVLFDQATYDK	M6	666.707
						DKLNNMVLFDQATYDK	M6	806.432
						DKLNNMVLFDQATYDK	N5	730.044
						DKLNNMVLFDQATYDK	N5	806.431
						DKLNNMVLFDQATYDK	N5	806.431
						DKLNNMVLFDQATYDK	N5	806.432
						DKLNNMVLFDQATYDK	N5	666.707
						DKLNNMVLFDQATYDK	N4	730.044
						DKLNNMVLFDQATYDK	N4	806.433
						DKLNNMVLFDQATYDK	N4	806.431
						DKLNNMVLFDQATYDK	N4	806.432
						DKLNNMVLFDQATYDK	N4	806.43
						DKLNNMVLFDQATYDK	N4	666.707
						DKLNNMVLFDQATYDK	N4	806.431
						DKLNNMVLFDQATYDK	D1	806.431
						DKLNNMVLFDQATYDK	D1	806.432
						DKLNNMVLFDQATYDK	D1	666.707
						DKLNNMVLFDQATYDK	D1	806.431
						DKLNNMVLFDQATYDK	D1	806.432
						DKLNNMVLFDQATYDK	V7	806.433
						DKLNNMVLFDQATYDK	V7	806.432
						DKLNNMVLFDQATYDK	K2	730.044
						DKLNNMVLFDQATYDK	L3	730.044
						DKLNNMVLFDQATYDK	L3	806.431
						DKLNNMVLFDQATYDK	L3	806.432
						DKLNNMVLFDQATYDK	L3	806.43
						DKLNNMVLFDQATYDK	L3	666.707
						DKLNNMVLFDQATYDK	L3	806.431
						DKLNNMVLFDQATYDK	L3	806.432
						LNNMVLFDQATYDK	N3	697.079
						LNNMVLFDQATYDK	N3	973
						LNNMVLFDQATYDK	M4	697.079
						LNNMVLFDQATYDK	M4	837.13
						LNNMVLFDQATYDK	M4	973
						LNNMVLFDQATYDK	M4	973.002
						LNNMVLFDQATYDKLYK	V5	776.998
						LNNMVLFDQATYDKLYK	N3	661.4
						LNNMVLFDQATYDKLYK	N3	860.139
						LNNMVLFDQATYDKLYK	N3	776.998
						LNNMVLFDQATYDKLYK	N3	703.751
						LNNMVLFDQATYDKLYK	M4	860.139
						LNNMVLFDQATYDKLYK	M4	776.998
						LNNMVLFDQATYDKLYK	M4	703.751
Q9NEN6	40S ribosomal protein S6	rps-6	KGDGEIEGLTDSVLPR	D3; E5; R16	528.94	MRLNFAYPATGLQK	M1	802.392
						MRLNFAYPATGLQK	R2	802.392
						MRLNFAYPATGLQK	N4	628.352
						MRLNFAYPATGLQK	F5	628.351
						MRLNFAYPATGLQK	F5	628.352
						MRLNFAYPATGLQK	A6	628.351
						MRLNFAYPATGLQK	A6	628.352
						MRLNFAYPATGLQK	L3	802.392
						MRLNFAYPATGLQK	L3	628.352
						MSQEVAIDALGDEWK	M1; E13; W14	998.991
						MSQEVAIDALGDEWK	M1; E13; W14	734.407
						MSQEVAIDALGDEWK	M1; D12; W14	998.991
						MSQEVAIDALGDEWK	M1; D12; W14	734.407
						RMSQEVAIDALGDEWK	M2	707.7
						RMSQEVAIDALGDEWK	R1	707.7
						RMSQEVAIDALGDEWK	Q4	707.7
P46769	40S ribosomal protein SA	rps-0	VDDWAAETATWTAETK	D3	905.91	FSPGCLTNQIQK	C5	820.93
			VDDWAAETATWTAETK	W11	913.907
			VDDWAAETATWTAETK	W11; A13	913.907
			VDDWAAETATWTAETK	W11; E14	913.907
			VDDWAAETATWTAETK	W4	905.91
P91913	60S acidic ribosomal protein P1	rla-1	AANVEFEPYWPGLFAK	P8; W10	935.958	AANVEFEPYWPGLFAK	W10	710.037
			AANVEFEPYWPGLFAK	P8; W10	935.959	AANVEFEPYWPGLFAK	W10	710.037
			AANVEFEPYWPGLFAK	P8; W10	935.955	AANVEFEPYWPGLFAK	W10	1064.55
			AANVEFEPYWPGLFAK	P8; Y9	935.958	AANVEFEPYWPGLFAK	W10	1064.55
			AANVEFEPYWPGLFAK	P8; Y9	935.959	AANVEFEPYWPGLFAK	W10	710.036
			AANVEFEPYWPGLFAK	P8; Y9	935.955	AANVEFEPYWPGLFAK	W10	1064.55
			AANVEFEPYWPGLFAK	W10	935.958	AANVEFEPYWPGLFAK	Y9; W10	710.037
			AANVEFEPYWPGLFAK	W10	935.959	AANVEFEPYWPGLFAK	Y9; W10	1064.55
			AANVEFEPYWPGLFAK	W10	935.955	AANVEFEPYWPGLFAK	Y9	1064.55
			AANVEFEPYWPGLFAK	W10; P11	935.959	AANVEFEPYWPGLFAK	Y9	1064.55
			AANVEFEPYWPGLFAK	W10; P11	935.955	AANVEFEPYWPGLFAK	Y9	1064.55
			AANVEFEPYWPGLFAK	Y9	935.958	AANVEFEPYWPGLFAK	N3; V4	710.038
			AANVEFEPYWPGLFAK	Y9; W10	935.958	AANVEFEPYWPGLFAK	P8; W10	710.037
			AANVEFEPYWPGLFAK	Y9; W10	935.959	AANVEFEPYWPGLFAK	P8; W10	1064.55
			AANVEFEPYWPGLFAK	Y9; W10	935.955	AANVEFEPYWPGLFAK	P8; Y9	710.037
						AANVEFEPYWPGLFAK	P8; Y9	1064.55
						AANVEFEPYWPGLFAK	P8; Y9	1064.55
						AANVEFEPYWPGLFAK	P8; Y9	1064.55
O01504	60S acidic ribosomal protein P2	C37A2.7	VLEAGGLDCDMENANSVVDALK	A4; L7	1148.03	VLEAGGLDCDMENANSVVDALK	C9; M11	1292.62
			VLEAGGLDCDMENANSVVDALK	A4; M11	1148.03	VLEAGGLDCDMENANSVVDALK	C9; M11	1292.62
			VLEAGGLDCDMENANSVVDALK	C9	1148.03
			VLEAGGLDCDMENANSVVDALK	C9; M11	1164.02
			VLEAGGLDCDMENANSVVDALK	D10; M11	1148.03
			VLEAGGLDCDMENANSVVDALK	D8; D10	1148.03
			VLEAGGLDCDMENANSVVDALK	D8; M11	1148.03
			VLEAGGLDCDMENANSVVDALK	L7; D10	1148.03
			VLEAGGLDCDMENANSVVDALK	L7; D8	1148.03
			VLEAGGLDCDMENANSVVDALK	L7; D8; D10; M11	1164.02
			VLEAGGLDCDMENANSVVDALK	L7; E12	1148.03
			VLEAGGLDCDMENANSVVDALK	L7; M11	1148.03
			VLEAGGLDCDMENANSVVDALK	M11	1148.03
			VLEAGGLDCDMENANSVVDALK	M11; E12	1148.03
Q9XVF7	60S ribosomal protein L8	rpl-2	AMIGLVAGGGR	A1	509.278	TTVVAAEGMHTGQFIHCGAK	M9; F14	793.726
			AMIGLVAGGGR	A1	509.278	TTVVAAEGMHTGQFIHCGAK	M9; F14	793.726
			AMIGLVAGGGR	M2	509.278	TTVVAAEGMHTGQFIHCGAK	F14; C17	793.726
			AMIGLVAGGGR	M2	509.278	TTVVAAEGMHTGQFIHCGAK	F14; C17	793.727
O62220	Acidic leucine-rich nuclear phosphoprotein 32-related protein 1	F33H2.3	MFEMIPSLK	M4	556.281	MFEMIPSLK	M4	801.756
						MFEMIPSLK	M4	558.679
						MFEMIPSLK	M4	684.877
						MFEMIPSLK	M1; M4	553.332
						MFEMIPSLK	M1; M4	692.874
						MFEMIPSLK	M1; M4	694.389
						MFEMIPSLK	M1; M4	603.005
						MFEMIPSLK	M1	801.756
						MFEMIPSLK	M1	684.877
						MFEMIPSLK	M1	766.396
O01615	Acidic leucine-rich nuclear phosphoprotein 32-related protein 2	T19H12.2	MFEMIPSLK	M4	556.281	LELLSMVK	M6	603.372
						MFEMIPSLK	M4	801.756
						MFEMIPSLK	M4	558.679
						MFEMIPSLK	M4	684.877
						MFEMIPSLK	M1; M4	553.332
						MFEMIPSLK	M1; M4	692.874
						MFEMIPSLK	M1; M4	694.389
						MFEMIPSLK	M1; M4	603.005
						MFEMIPSLK	M1	801.756
						MFEMIPSLK	M1	684.877
						MFEMIPSLK	M1	766.396
O45815	ACTin	act-5	HQGVMVGMGQK	M5; M8	618.278	DLTDYMMK	M6	653.317
			HQGVMVGMGQK	M5; M8	602.286	DLTDYMMK	M7	653.316
			HQGVMVGMGQK	M5; V6; M8	610.282	DLTDYMMK	M7	653.317
			HQGVMVGMGQK	M5; V6; M8	407.189	DLTDYMMK	M7	653.317
			HQGVMVGMGQK	M5; V6; M8	407.191	DLTDYMMK	M7	653.318
			HQGVMVGMGQK	M5; V6; M8; Q10	618.278	DLTDYMMK	M7	653.317
			HQGVMVGMGQK	V6; M8	602.286	DLTDYMMK	M6; M7	653.316
						DLTDYMMK	M6; M7	653.317
						DLTDYMMK	M6; M7	653.317
						DLTDYMMK	M6; M7	653.318
						DLTDYMMK	M6; M7	653.317
						DLTDYMMK	M6; M7	653.317
						DLTDYMMK	M6; M7	653.316
						DLTDYMMK	M6; M7	653.317
						EIQHLAPSTMK	M10	509.952
						EIQHLAPSTMK	M10	509.952
						EIQHLAPSTMK	M10	509.951
						EIQHLAPSTMK	M10	509.951
						EIQHLAPSTMK	M10	681.861
						HQGVMVGMGQK	V4; M8	487.59
						HQGVMVGMGQK	V4; M8	487.59
						HQGVMVGMGQK	V4; M8	487.59
						HQGVMVGMGQK	V4; M8	487.59
						HQGVMVGMGQK	V4; M8	487.59
						HQGVMVGMGQK	V4; M8	487.591
						HQGVMVGMGQK	V4; M8	487.59
						HQGVMVGMGQK	Q2; M8	487.59
						HQGVMVGMGQK	Q2; M8	487.59
						HQGVMVGMGQK	Q2; M8	487.59
						HQGVMVGMGQK	Q2; M8	487.59
						HQGVMVGMGQK	Q2; M8	487.59
						HQGVMVGMGQK	Q2; M8	487.591
						HQGVMVGMGQK	Q2; M8	487.59
						HQGVMVGMGQK	Q2; M8	487.59
						HQGVMVGMGQK	Q2; M8	487.59
						HQGVMVGMGQK	Q2	482.258
						HQGVMVGMGQK	Q2	482.258
						HQGVMVGMGQK	H1	482.258
						HQGVMVGMGQK	H1	482.258
						HQGVMVGMGQK	V4	482.258
						HQGVMVGMGQK	H1; M5; M8	492.922
						HQGVMVGMGQK	H1; M5; M8	492.921
						HQGVMVGMGQK	M5; V6; M8	492.921
						HQGVMVGMGQK	H1; M8	487.59
						HQGVMVGMGQK	H1; M8	487.59
						HQGVMVGMGQK	H1; M8	487.59
						HQGVMVGMGQK	H1; M8	487.59
						HQGVMVGMGQK	H1; M8	487.59
						HQGVMVGMGQK	H1; M8	487.591
						HQGVMVGMGQK	H1; M8	487.59
						HQGVMVGMGQK	H1; M8	487.59
						HQGVMVGMGQK	Q2; M5; M8	492.922
						HQGVMVGMGQK	Q2; M5; M8	492.921
						HQGVMVGMGQK	H1; Q2; M8	492.921
						HQGVMVGMGQK	Q2; V4; M8	492.921
						HQGVMVGMGQK	H1; V4; M8	492.921
						HQGVMVGMGQK	V4; M5; M8	492.921
						HQGVMVGMGQK	V4; M5; M8	492.922
						HQGVMVGMGQK	V4; M5; M8	492.921
						HQGVMVGMGQK	M5	482.258
						HQGVMVGMGQK	M5	482.258
						HQGVMVGMGQK	M5	722.884
						HQGVMVGMGQK	M5; M8	487.59
						HQGVMVGMGQK	M5; M8	487.59
						HQGVMVGMGQK	M5; M8	487.59
						HQGVMVGMGQK	M5; M8	487.59
						HQGVMVGMGQK	M5; M8	487.59
						HQGVMVGMGQK	M8	482.258
						HQGVMVGMGQK	M8	482.258
P0DM41	Actin-1	act-1	HQGVMVGMGQK	M5; M8	618.278	DLTDYLMK	M7	521.76
			HQGVMVGMGQK	M5; M8	602.286	DLTDYLMK	M7	521.76
			HQGVMVGMGQK	M5; V6; M8	610.282	DLTDYLMK	M7	521.76
			HQGVMVGMGQK	M5; V6; M8	407.189	EITALAPSTMK	M10	717.908
			HQGVMVGMGQK	M5; V6; M8	407.191	EITALAPSTMK	M10	717.908
			HQGVMVGMGQK	M5; V6; M8; Q10	618.278	EITALAPSTMK	M10	717.908
			HQGVMVGMGQK	V6; M8	602.286	EITALAPSTMK	M10	717.906
						EITALAPSTMK	M10	559.319
						EITALAPSTMK	M10	717.908
						EITALAPSTMK	M10	664.345
						EITALAPSTMK	M10	717.908
						EITALAPSTMK	M10	717.907
						EITALAPSTMK	M10	717.908
						EITALAPSTMK	M10	717.908
						EITALAPSTMK	P7	717.908
						EITALAPSTMK	P7	717.908
						EITALAPSTMK	P7	717.908
						EITALAPSTMK	P7	717.906
						EITALAPSTMK	P7	559.319
						EITALAPSTMK	P7	717.908
						EITALAPSTMK	P7	664.345
						EITALAPSTMK	P7	717.907
						EITALAPSTMK	P7	717.908
						EITALAPSTMK	P7	717.908
						HQGVMVGMGQK	V4; M8	487.59
						HQGVMVGMGQK	V4; M8	487.59
						HQGVMVGMGQK	V4; M8	487.59
						HQGVMVGMGQK	V4; M8	487.59
						HQGVMVGMGQK	V4; M8	487.59
						HQGVMVGMGQK	V4; M8	487.591
						HQGVMVGMGQK	V4; M8	487.59
						HQGVMVGMGQK	Q2; M8	487.59
						HQGVMVGMGQK	Q2; M8	487.59
						HQGVMVGMGQK	Q2; M8	487.59
						HQGVMVGMGQK	Q2; M8	487.59
						HQGVMVGMGQK	Q2; M8	487.59
						HQGVMVGMGQK	Q2; M8	487.591
						HQGVMVGMGQK	Q2; M8	487.59
						HQGVMVGMGQK	Q2; M8	487.59
						HQGVMVGMGQK	Q2; M8	487.59
						HQGVMVGMGQK	Q2	482.258
						HQGVMVGMGQK	Q2	482.258
						HQGVMVGMGQK	H1	482.258
						HQGVMVGMGQK	H1	482.258
						HQGVMVGMGQK	V4	482.258
						HQGVMVGMGQK	H1; M5; M8	492.922
						HQGVMVGMGQK	H1; M5; M8	492.921
						HQGVMVGMGQK	M5; V6; M8	492.921
						HQGVMVGMGQK	H1; M8	487.59
						HQGVMVGMGQK	H1; M8	487.59
						HQGVMVGMGQK	H1; M8	487.59
						HQGVMVGMGQK	H1; M8	487.59
						HQGVMVGMGQK	H1; M8	487.59
						HQGVMVGMGQK	H1; M8	487.591
						HQGVMVGMGQK	H1; M8	487.59
						HQGVMVGMGQK	H1; M8	487.59
						HQGVMVGMGQK	Q2; M5; M8	492.922
						HQGVMVGMGQK	Q2; M5; M8	492.921
						HQGVMVGMGQK	H1; Q2; M8	492.921
						HQGVMVGMGQK	Q2; V4; M8	492.921
						HQGVMVGMGQK	H1; V4; M8	492.921
						HQGVMVGMGQK	V4; M5; M8	492.921
						HQGVMVGMGQK	V4; M5; M8	492.922
						HQGVMVGMGQK	V4; M5; M8	492.921
						HQGVMVGMGQK	M5	482.258
						HQGVMVGMGQK	M5	482.258
						HQGVMVGMGQK	M5	722.884
						HQGVMVGMGQK	M5; M8	487.59
						HQGVMVGMGQK	M5; M8	487.59
						HQGVMVGMGQK	M5; M8	487.59
						HQGVMVGMGQK	M5; M8	487.59
						HQGVMVGMGQK	M5; M8	487.59
						HQGVMVGMGQK	M8	482.258
						HQGVMVGMGQK	M8	482.258
O01805	Acyl-CoA-binding protein homolog 1	acbp-1	QGTVGDNTTDKPGMFDLK	F15	647.309	QGTVGDNTTDKPGMFDLK	M14	707.405
			QGTVGDNTTDKPGMFDLK	F15	970.466	QGTVGDNTTDKPGMFDLK	M14	809.427
			QGTVGDNTTDKPGMFDLK	M14	647.309	QGTVGDNTTDKPGMFDLK	M14	809.427
			QGTVGDNTTDKPGMFDLK	M14	970.466	QGTVGDNTTDKPGMFDLK	M14	809.426
			QGTVGDNTTDKPGMFDLK	P12	647.309	QGTVGDNTTDKPGMFDLK	M14	760.437
			QGTVGDNTTDKPGMFDLK	P12	970.466	QGTVGDNTTDKPGMFDLK	M14	809.426
						QGTVGDNTTDKPGMFDLK	M14	809.426
						QGTVGDNTTDKPGMFDLK	L17	457.261
						QGTVGDNTTDKPGMFDLK	P12	707.405
						QGTVGDNTTDKPGMFDLK	P12	809.427
						QGTVGDNTTDKPGMFDLK	P12	809.427
						QGTVGDNTTDKPGMFDLK	P12	809.426
						QGTVGDNTTDKPGMFDLK	P12	760.437
						QGTVGDNTTDKPGMFDLK	P12	809.426
						QGTVGDNTTDKPGMFDLK	P12	809.426
						QGTVGDNTTDKPGMFDLK	P12	627.024
						QGTVGDNTTDKPGMFDLK	D16	809.427
						QGTVGDNTTDKPGMFDLK	D16	809.426
						QGTVGDNTTDKPGMFDLK	D16	457.261
						QGTVGDNTTDKPGMFDLK	F15	809.427
						QGTVGDNTTDKPGMFDLK	F15	809.427
						QGTVGDNTTDKPGMFDLK	F15	809.426
						QGTVGDNTTDKPGMFDLK	F15	760.437
						QGTVGDNTTDKPGMFDLK	F15	809.426
						QGTVGDNTTDKPGMFDLK	F15	809.426
						QGTVGDNTTDKPGMFDLK	F15	457.261
Q20507	Acyl-CoA-binding protein homolog 3	acbp-3	IAEELDVAAWLEQIDPVIK	A8; A9	728.721	ALNDMFDK	M5	613.817
			IAEELDVAAWLEQIDPVIK	A8; A9	1092.58	ALNDMFDK	M5	613.818
			IAEELDVAAWLEQIDPVIK	A8; L11	1092.58
			IAEELDVAAWLEQIDPVIK	A8; W10	728.721
			IAEELDVAAWLEQIDPVIK	A8; W10	1092.58
			IAEELDVAAWLEQIDPVIK	A9; L11	1092.58
			IAEELDVAAWLEQIDPVIK	A9; L11	1092.58
			IAEELDVAAWLEQIDPVIK	A9; W10	1092.58
			IAEELDVAAWLEQIDPVIK	A9; W10	728.721
			IAEELDVAAWLEQIDPVIK	A9; W10	1092.58
			IAEELDVAAWLEQIDPVIK	L11; E12	1092.58
			IAEELDVAAWLEQIDPVIK	L11; E12	1092.58
			IAEELDVAAWLEQIDPVIK	L11; Q13	1092.58
			IAEELDVAAWLEQIDPVIK	L11; Q13	1092.58
			IAEELDVAAWLEQIDPVIK	V7; A8	728.721
			IAEELDVAAWLEQIDPVIK	V7; A9	728.721
			IAEELDVAAWLEQIDPVIK	V7; Q13	1092.58
			IAEELDVAAWLEQIDPVIK	W10	1092.58
			IAEELDVAAWLEQIDPVIK	W10	728.721
			IAEELDVAAWLEQIDPVIK	W10	1092.58
			IAEELDVAAWLEQIDPVIK	W10; E12	1092.58
			IAEELDVAAWLEQIDPVIK	W10; E12	1092.58
			IAEELDVAAWLEQIDPVIK	W10; Q13	1092.58
			IAEELDVAAWLEQIDPVIK	W10; Q13	1092.58
O45865	Adenine Nucleotide Translocator	ant-1.1	IIQNEGMSAMFK	M10	692.834	IIQNEGMSAMFK	M7; A9; M10	702.401
						IIQNEGMSAMFK	M10	829.426
						IIQNEGMSAMFK	M10	829.428
						IIQNEGMSAMFK	M10	829.428
						IIQNEGMSAMFK	M10	829.427
						IIQNEGMSAMFK	M10	821.43
						IIQNEGMSAMFK	M7; M10; F11	702.401
						IIQNEGMSAMFK	A9; M10	829.426
						IIQNEGMSAMFK	A9; M10	829.428
						IIQNEGMSAMFK	A9; M10	829.428
						IIQNEGMSAMFK	A9; M10	829.427
						IIQNEGMSAMFK	M7	829.426
						IIQNEGMSAMFK	M7	829.428
						IIQNEGMSAMFK	M7	829.427
						IIQNEGMSAMFK	M7	821.432
						IIQNEGMSAMFK	E5; M10	553.288
						IIQNEGMSAMFK	M7; M10	829.426
						IIQNEGMSAMFK	M7; M10	553.287
						IIQNEGMSAMFK	M7; M10	829.428
						IIQNEGMSAMFK	M7; M10	829.428
						IIQNEGMSAMFK	M7; M10	829.427
						IIQNEGMSAMFK	M7; M10	553.288
						IIQNEGMSAMFK	F11	702.401
						IIQNEGMSAMFK	Q3; M10	553.288
						IIQNEGMSAMFK	I1; M10	553.288
						IIQNEGMSAMFK	I2; M10	553.288
						KIIQNEGMSAMFK	M8; M11	672.372
						KIIQNEGMSAMFK	M8; M11	715.409
						KIIQNEGMSAMFK	M8; M11	672.376
						KIIQNEGMSAMFK	M8; M11	672.374
						KIIQNEGMSAMFK	M8; M11	672.373
						KIIQNEGMSAMFK	M8; M11	672.374
						KIIQNEGMSAMFK	M8; M11	672.374
						KIIQNEGMSAMFK	M8; A10	672.372
						KIIQNEGMSAMFK	M8; A10	715.409
						KIIQNEGMSAMFK	M8; A10	672.376
						KIIQNEGMSAMFK	M8; A10	672.374
						KIIQNEGMSAMFK	M8; A10	672.373
						KIIQNEGMSAMFK	M8; A10	672.374
						KIIQNEGMSAMFK	M11	715.409
						KIIQNEGMSAMFK	M11	672.374
						KIIQNEGMSAMFK	M11	672.373
						KIIQNEGMSAMFK	M11	672.374
						KIIQNEGMSAMFK	M8	672.372
						KIIQNEGMSAMFK	M8	715.409
						KIIQNEGMSAMFK	M8	672.376
						KIIQNEGMSAMFK	M8	672.374
						KIIQNEGMSAMFK	M8	672.373
						KIIQNEGMSAMFK	M8	672.374
						MVFASDGQK	M1	646.351
						MVFASDGQK	M1	628.331
						YFPTQAMNFAFK	M7	868.456
						YFPTQAMNFAFK	M7	869.447
						YFPTQAMNFAFK	M7	825.465
						YFPTQAMNFAFK	M7	869.448
						YFPTQAMNFAFK	M7	869.447
						YFPTQAMNFAFK	M7	869.448
						YFPTQAMNFAFK	M7	633.868
						YFPTQAMNFAFK	M7	579.967
						YFPTQAMNFAFK	A6	869.447
O01530	Aspartic protease 6	asp-6	SWTIQYGSGDAAGILGQDTVR	W2	1114.04	MGFAPSLQK	M1	626.351
						MGFAPSLQK	M1	695.894
P46561	ATP synthase subunit beta, mitochondrial	atp-2	IPSAVGYQPTLATDMGSMQER	A12	1134.54	GFTMILK	M4	541.828
			IPSAVGYQPTLATDMGSMQER	D14	1134.54	GFTMILK	M4	541.828
			IPSAVGYQPTLATDMGSMQER	L11	1134.54	GFTMILK	M4	782.772
			IPSAVGYQPTLATDMGSMQER	M15	1134.54	GFTMILK	M4	541.828
			IPSAVGYQPTLATDMGSMQER	P9	1134.54	GFTMILK	M4	541.827
			IPSAVGYQPTLATDMGSMQER	Q19	1134.54	IMNVIGEPIDERGPIASK	M2	738.079
						TVLIMELINNVAK	M5	901.501
						TVLIMELINNVAK	M5	866.019
						TVLIMELINNVAK	M5	866.019
						TVLIMELINNVAK	M5	866.018
						TVLIMELINNVAK	M5	866.018
						TVLIMELINNVAK	M5	866.019
						TVLIMELINNVAK	M5	866.018
						TVLIMELINNVAK	M5	866.018
						TVLIMELINNVAK	M5	866.02
						TVLIMELINNVAK	M5	866.018
P91027	Calponin Homology Domain containing Protein	chdp-1	NIDAFGAWAQK	W8	626.8	NIDAFGAWAQK	A7; W8	755.397
			NIDAFGAWAQK	W8; A9	626.8	NIDAFGAWAQK	W8; A9	755.397
						NIDAFGAWAQK	W8	755.397
Q23050	CaLponIn-liKe proteins	clik-1	EGASQAGMTGFGAFR	M8	751.838	DSQGFIHLQMGTNK	L8	616.987
			EGASQAGMTGFGAFR	M8	751.84	DSQGFIHLQMGTNK	Q9	616.987
			FANQAGMTGFGMPR	M12	750.84	DSQGFIHLQMGTNK	M10	616.988
			FANQAGMTGFGMPR	M12	750.841	DSQGFIHLQMGTNK	M10	616.987
			FANQAGMTGFGMPR	M7	750.841	DSQGFIHLQMGTNK	M10	616.987
			FANQAGMTGFGMPR	M7	750.842	DSQGFIHLQMGTNK	M10	616.988
			GMTGFGVPR	M2	469.231	DSQGFIHLQMGTNK	M10	681.367
			GMTGFGVPR	M2	469.232	DSQGFIHLQMGTNK	M10	616.987
			LASQAGMTGIGMPR	M12	711.348	DSQGFIHLQMGTNK	M10	616.988
			LASQAGMTGIGMPR	M12	703.352	RPDVPFWTGQK	W7	540.63
			LASQAGMTGIGMPR	M7	711.348	RPDVPFWTGQK	W7	734.375
			LASQAGMTGIGMPR	M7	703.351	RPDVPFWTGQK	W7	540.63
			LASQAGMTGIGMPR	M7	703.352	RPDVPFWTGQK	P5; W7	540.63
			LASQAGMTGIGMPR	M7; M12	711.348	RPDVPFWTGQK	P5; W7	734.375
			LASQAGMTGIGMPR	M7; M12	711.347	RPDVPFWTGQK	P5; F6	540.63
			LASQAGMTGIGMPR	P13	703.352	RPDVPFWTGQK	P5; F6	734.375
			LASQAGMTGIGMPR	R14	703.352	SQGMIPYQMGVNFLESQAGK	Q2; M9	825.414
			NNTVAFMQAQDQR	M7	769.856	SQGMIPYQMGVNFLESQAGK	Q2; M9	825.413
			NNTVAFMQAQDQR	M7	769.852	SQGMIPYQMGVNFLESQAGK	Q2; M9	618.873
			NNTVAFMQAQDQR	M7	769.854	SQGMIPYQMGVNFLESQAGK	Q2; M9	806.427
			SQGMIPYQMGVNFLESQAGK	M4	1101.02	SQGMIPYQMGVNFLESQAGK	Q2; M9	825.413
						SQGMIPYQMGVNFLESQAGK	Q2; M9	825.414
						SQGMIPYQMGVNFLESQAGK	Q2; M9	825.413
						SQGMIPYQMGVNFLESQAGK	Q2; M9	825.413
						SQGMIPYQMGVNFLESQAGK	V11	645.03
						SQGMIPYQMGVNFLESQAGK	V11	820.083
						SQGMIPYQMGVNFLESQAGK	Q2; Y7	825.413
						SQGMIPYQMGVNFLESQAGK	Q2; Y7	806.427
						SQGMIPYQMGVNFLESQAGK	Q2; Y7	825.414
						SQGMIPYQMGVNFLESQAGK	Q2; Y7	825.413
						SQGMIPYQMGVNFLESQAGK	I5	820.083
						SQGMIPYQMGVNFLESQAGK	I5	820.083
						SQGMIPYQMGVNFLESQAGK	P6	820.083
						SQGMIPYQMGVNFLESQAGK	I5; M9	825.414
						SQGMIPYQMGVNFLESQAGK	I5; M9	825.413
						SQGMIPYQMGVNFLESQAGK	I5; M9	618.873
						SQGMIPYQMGVNFLESQAGK	I5; M9	806.427
						SQGMIPYQMGVNFLESQAGK	I5; M9	825.413
						SQGMIPYQMGVNFLESQAGK	I5; M9	825.414
						SQGMIPYQMGVNFLESQAGK	I5; M9	825.413
						SQGMIPYQMGVNFLESQAGK	Q2; Q8	825.413
						SQGMIPYQMGVNFLESQAGK	Q2; Q8	806.427
						SQGMIPYQMGVNFLESQAGK	Q2; Q8	825.414
						SQGMIPYQMGVNFLESQAGK	Q2; Q8	825.413
						SQGMIPYQMGVNFLESQAGK	I5; P6	825.414
						SQGMIPYQMGVNFLESQAGK	I5; P6	825.414
						SQGMIPYQMGVNFLESQAGK	I5; P6	825.413
						SQGMIPYQMGVNFLESQAGK	I5; P6	618.873
						SQGMIPYQMGVNFLESQAGK	I5; P6	806.427
						SQGMIPYQMGVNFLESQAGK	I5; P6	825.413
						SQGMIPYQMGVNFLESQAGK	I5; P6	825.414
						SQGMIPYQMGVNFLESQAGK	I5; P6	825.413
						SQGMIPYQMGVNFLESQAGK	Q8; M9	618.873
						SQGMIPYQMGVNFLESQAGK	Q8; M9	806.427
						SQGMIPYQMGVNFLESQAGK	Q8; M9	825.413
						SQGMIPYQMGVNFLESQAGK	Q8; M9	825.414
						SQGMIPYQMGVNFLESQAGK	Q8; M9	825.413
						SQGMIPYQMGVNFLESQAGK	I5; Q8	825.414
						SQGMIPYQMGVNFLESQAGK	I5; Q8	825.413
						SQGMIPYQMGVNFLESQAGK	I5; Q8	618.873
						SQGMIPYQMGVNFLESQAGK	I5; Q8	806.427
						SQGMIPYQMGVNFLESQAGK	I5; Q8	825.414
						SQGMIPYQMGVNFLESQAGK	I5; Q8	825.413
						SQGMIPYQMGVNFLESQAGK	N12	820.083
						SQGMIPYQMGVNFLESQAGK	M4	825.414
						SQGMIPYQMGVNFLESQAGK	M4	825.413
						SQGMIPYQMGVNFLESQAGK	M4	618.873
						SQGMIPYQMGVNFLESQAGK	M4	825.413
						SQGMIPYQMGVNFLESQAGK	M4	825.414
						SQGMIPYQMGVNFLESQAGK	M4	825.413
						SQGMIPYQMGVNFLESQAGK	M4	820.083
						SQGMIPYQMGVNFLESQAGK	Q2	820.083
						SQGMIPYQMGVNFLESQAGK	Q2	820.083
						SQGMIPYQMGVNFLESQAGK	M4; M9	825.414
						SQGMIPYQMGVNFLESQAGK	M4; M9	825.413
						SQGMIPYQMGVNFLESQAGK	M4; M9	618.873
						SQGMIPYQMGVNFLESQAGK	M4; M9	806.427
						SQGMIPYQMGVNFLESQAGK	M4; M9	825.413
						SQGMIPYQMGVNFLESQAGK	M4; M9	825.414
						SQGMIPYQMGVNFLESQAGK	M4; M9	825.413
						SQGMIPYQMGVNFLESQAGK	Q2; P6	825.414
						SQGMIPYQMGVNFLESQAGK	Q2; P6	825.413
						SQGMIPYQMGVNFLESQAGK	Q2; P6	806.427
						SQGMIPYQMGVNFLESQAGK	Q2; P6	825.414
						SQGMIPYQMGVNFLESQAGK	Q2; P6	825.413
						SQGMIPYQMGVNFLESQAGK	M4; P6	825.414
						SQGMIPYQMGVNFLESQAGK	M4; P6	825.414
						SQGMIPYQMGVNFLESQAGK	M4; P6	825.413
						SQGMIPYQMGVNFLESQAGK	M4; P6	618.873
						SQGMIPYQMGVNFLESQAGK	M4; P6	825.414
						SQGMIPYQMGVNFLESQAGK	Q2; V11	825.414
						SQGMIPYQMGVNFLESQAGK	Q2; V11	618.873
						SQGMIPYQMGVNFLESQAGK	Q2; V11	806.427
						SQGMIPYQMGVNFLESQAGK	Q2; V11	825.413
						SQGMIPYQMGVNFLESQAGK	M4; V11	825.414
						SQGMIPYQMGVNFLESQAGK	M4; V11	618.873
						SQGMIPYQMGVNFLESQAGK	M4; V11	825.413
						SQGMIPYQMGVNFLESQAGK	Q8	645.03
						SQGMIPYQMGVNFLESQAGK	Q8	820.083
						SQGMIPYQMGVNFLESQAGK	M4; Y7	825.413
						SQGMIPYQMGVNFLESQAGK	M4; Y7	825.413
						SQGMIPYQMGVNFLESQAGK	Q8; V11	825.414
						SQGMIPYQMGVNFLESQAGK	Q8; V11	618.873
						SQGMIPYQMGVNFLESQAGK	Q8; V11	825.413
						SQGMIPYQMGVNFLESQAGK	M9	825.414
						SQGMIPYQMGVNFLESQAGK	M9	825.414
						SQGMIPYQMGVNFLESQAGK	M9	825.413
						SQGMIPYQMGVNFLESQAGK	M9	618.873
						SQGMIPYQMGVNFLESQAGK	M9	806.427
						SQGMIPYQMGVNFLESQAGK	M9	825.413
						SQGMIPYQMGVNFLESQAGK	M9	825.414
						SQGMIPYQMGVNFLESQAGK	M9	825.413
						SQGMIPYQMGVNFLESQAGK	M9	825.413
						SQGMIPYQMGVNFLESQAGK	M9	645.03
						SQGMIPYQMGVNFLESQAGK	M9	820.083
						SQGMIPYQMGVNFLESQAGK	Y7	825.414
						SQGMIPYQMGVNFLESQAGK	Y7	825.414
						SQGMIPYQMGVNFLESQAGK	Y7	825.413
						SQGMIPYQMGVNFLESQAGK	Y7	618.873
						SQGMIPYQMGVNFLESQAGK	Y7	806.427
						SQGMIPYQMGVNFLESQAGK	Y7	825.413
						SQGMIPYQMGVNFLESQAGK	Y7	825.414
						SQGMIPYQMGVNFLESQAGK	Y7	825.413
						SQGMIPYQMGVNFLESQAGK	Y7	825.413
						SQGMIPYQMGVNFLESQAGK	F13	820.083
G5EBH7	CALUmenin (Calcium-binding protein) homolog	calu-1	EMVYGSADGAGQELSPEYAK	E1	706.651	EMVYGSADGAGQELSPEYAK	A10	792.38
			EMVYGSADGAGQELSPEYAK	E1	706.651	EMVYGSADGAGQELSPEYAK	A10	792.381
			EMVYGSADGAGQELSPEYAK	E1	1059.47	EMVYGSADGAGQELSPEYAK	A10	792.382
			EMVYGSADGAGQELSPEYAK	E1	1059.47	EMVYGSADGAGQELSPEYAK	V3	792.386
			EMVYGSADGAGQELSPEYAK	M2	706.651	EMVYGSADGAGQELSPEYAK	V3	792.386
			EMVYGSADGAGQELSPEYAK	M2	706.651	EMVYGSADGAGQELSPEYAK	V3	573.353
			EMVYGSADGAGQELSPEYAK	M2	1059.47	EMVYGSADGAGQELSPEYAK	V3	1188.07
			EMVYGSADGAGQELSPEYAK	M2	1059.47	EMVYGSADGAGQELSPEYAK	V3	1188.07
			MDADSDGFIEENELK	D2	864.873	EMVYGSADGAGQELSPEYAK	V3	1188.07
			MDADSDGFIEENELK	M1	864.873	EMVYGSADGAGQELSPEYAK	V3	717.907
			WAVADYDSNGALDR	A2	784.853	EMVYGSADGAGQELSPEYAK	V3	792.381
			WAVADYDSNGALDR	W1	784.853	EMVYGSADGAGQELSPEYAK	V3	1188.07
						EMVYGSADGAGQELSPEYAK	V3	1188.07
						EMVYGSADGAGQELSPEYAK	V3	1188.07
						EMVYGSADGAGQELSPEYAK	V3	792.38
						EMVYGSADGAGQELSPEYAK	V3	792.382
						EMVYGSADGAGQELSPEYAK	V3	792.38
						EMVYGSADGAGQELSPEYAK	V3	792.382
						EMVYGSADGAGQELSPEYAK	V3	792.381
						EMVYGSADGAGQELSPEYAK	V3	792.382
						EMVYGSADGAGQELSPEYAK	V3	792.38
						EMVYGSADGAGQELSPEYAK	V3	792.38
						EMVYGSADGAGQELSPEYAK	V3	1188.07
						EMVYGSADGAGQELSPEYAK	V3	1188.07
						EMVYGSADGAGQELSPEYAK	V3	1188.07
						EMVYGSADGAGQELSPEYAK	V3	792.382
						EMVYGSADGAGQELSPEYAK	M2	580.858
						EMVYGSADGAGQELSPEYAK	M2	792.386
						EMVYGSADGAGQELSPEYAK	M2	792.387
						EMVYGSADGAGQELSPEYAK	M2	792.386
						EMVYGSADGAGQELSPEYAK	M2	573.353
						EMVYGSADGAGQELSPEYAK	M2	1188.07
						EMVYGSADGAGQELSPEYAK	M2	1188.07
						EMVYGSADGAGQELSPEYAK	M2	1188.07
						EMVYGSADGAGQELSPEYAK	M2	717.907
						EMVYGSADGAGQELSPEYAK	M2	792.381
						EMVYGSADGAGQELSPEYAK	M2	1188.07
						EMVYGSADGAGQELSPEYAK	M2	1188.07
						EMVYGSADGAGQELSPEYAK	M2	1188.07
						EMVYGSADGAGQELSPEYAK	M2	792.38
						EMVYGSADGAGQELSPEYAK	M2	792.382
						EMVYGSADGAGQELSPEYAK	M2	792.38
						EMVYGSADGAGQELSPEYAK	M2	792.382
						EMVYGSADGAGQELSPEYAK	M2	792.381
						EMVYGSADGAGQELSPEYAK	M2	792.382
						EMVYGSADGAGQELSPEYAK	M2	792.38
						EMVYGSADGAGQELSPEYAK	M2	792.38
						EMVYGSADGAGQELSPEYAK	M2	1188.07
						EMVYGSADGAGQELSPEYAK	M2	1188.07
						EMVYGSADGAGQELSPEYAK	M2	1188.07
						EMVYGSADGAGQELSPEYAK	A7	792.387
						EMVYGSADGAGQELSPEYAK	A7	792.386
						EMVYGSADGAGQELSPEYAK	A7	792.38
						EMVYGSADGAGQELSPEYAK	A7	792.382
						EMVYGSADGAGQELSPEYAK	A7	792.382
						EMVYGSADGAGQELSPEYAK	A7	792.38
						EMVYGSADGAGQELSPEYAK	A7	792.38
						EMVYGSADGAGQELSPEYAK	A7	792.382
						EMVYGSADGAGQELSPEYAK	Y4	792.386
						EMVYGSADGAGQELSPEYAK	Y4	792.386
						EMVYGSADGAGQELSPEYAK	Y4	792.381
						EMVYGSADGAGQELSPEYAK	Y4	792.382
						EMVYGSADGAGQELSPEYAK	Y4	792.382
						EMVYGSADGAGQELSPEYAK	Y4	792.38
						EMVYGSADGAGQELSPEYAK	Y4	792.382
						EMVYGSADGAGQELSPEYAK	Y4	792.381
						EMVYGSADGAGQELSPEYAK	Y4	792.382
						EMVYGSADGAGQELSPEYAK	Y4	792.38
						EMVYGSADGAGQELSPEYAK	Y4	792.38
						EMVYGSADGAGQELSPEYAK	Y4	792.382
						EMVYGSADGAGQELSPEYAK	D8	792.386
						EMVYGSADGAGQELSPEYAK	D8	792.38
						EMVYGSADGAGQELSPEYAK	D8	792.381
						EMVYGSADGAGQELSPEYAK	D8	792.382
						EMVYGSADGAGQELSPEYAK	D8	792.38
						EMVYGSADGAGQELSPEYAK	D8	792.382
						EMVYGSADGAGQELSPEYAK	E1	580.858
						EMVYGSADGAGQELSPEYAK	E1	792.386
						EMVYGSADGAGQELSPEYAK	E1	792.387
						EMVYGSADGAGQELSPEYAK	E1	792.386
						EMVYGSADGAGQELSPEYAK	E1	573.353
						EMVYGSADGAGQELSPEYAK	E1	1188.07
						EMVYGSADGAGQELSPEYAK	E1	1188.07
						EMVYGSADGAGQELSPEYAK	E1	1188.07
						EMVYGSADGAGQELSPEYAK	E1	717.907
						EMVYGSADGAGQELSPEYAK	E1	792.381
						EMVYGSADGAGQELSPEYAK	E1	1188.07
						EMVYGSADGAGQELSPEYAK	E1	1188.07
						EMVYGSADGAGQELSPEYAK	E1	1188.07
						EMVYGSADGAGQELSPEYAK	E1	792.38
						EMVYGSADGAGQELSPEYAK	E1	792.382
						EMVYGSADGAGQELSPEYAK	E1	792.38
						EMVYGSADGAGQELSPEYAK	E1	792.382
						EMVYGSADGAGQELSPEYAK	E1	792.381
						EMVYGSADGAGQELSPEYAK	E1	792.382
						EMVYGSADGAGQELSPEYAK	E1	792.38
						EMVYGSADGAGQELSPEYAK	E1	1188.07
						EMVYGSADGAGQELSPEYAK	E1	1188.07
						EMVYGSADGAGQELSPEYAK	E1	1188.07
						MDADSDGFIEENELK	M1	993.465
						MDADSDGFIEENELK	M1	773.434
						MDADSDGFIEENELK	M1	993.462
						MDADSDGFIEENELKDHINFMQK	D4; M21	809.425
						MDADSDGFIEENELKDHINFMQK	M1; M21	811.894
						MDADSDGFIEENELKDHINFMQK	M1; M21	811.895
						MDADSDGFIEENELKDHINFMQK	M1; M21	653.352
						MDADSDGFIEENELKDHINFMQK	M1; M21	809.425
						MDADSDGFIEENELKDHINFMQK	M1; F20	809.425
						MDADSDGFIEENELKDHINFMQK	D2; F20	809.425
						MDADSDGFIEENELKDHINFMQK	A3; M21	809.425
						MDADSDGFIEENELKDHINFMQK	D2; M21	811.894
						MDADSDGFIEENELKDHINFMQK	D2; M21	811.895
						MDADSDGFIEENELKDHINFMQK	D2; M21	653.352
						MDADSDGFIEENELKDHINFMQK	D2; M21	809.425
Q9BKQ9	CDGSH Iron Sulfur Domain protein homolog	cisd-3.2	MVAFDESPVYAGVAQK	M1	864.412	MVAFDESPVYAGVAQK	M1	485.959
			MVAFDESPVYAGVAQK	M1	864.418	MVAFDESPVYAGVAQK	M1	993.018
			MVAFDESPVYAGVAQK	V2	864.412	MVAFDESPVYAGVAQK	M1	728.933
			MVAFDESPVYAGVAQK	V2	864.418
P50140	Chaperonin homolog Hsp-60, mitochondrial	hsp-60	FVDMFEAGIIDPTK	M4	799.891	DMGIATGATIFGDDSNLIK	M2	1106.57
						DMGIATGATIFGDDSNLIK	M2	738.051
						DMGIATGATIFGDDSNLIK	M2	801.099
						DMGIATGATIFGDDSNLIK	I4	1106.57
						DMGIATGATIFGDDSNLIK	I4	738.051
						DMGIATGATIFGDDSNLIK	I4	738.051
						DMGIATGATIFGDDSNLIK	I4	801.099
						DMGIATGATIFGDDSNLIK	A8	738.051
						DMGIATGATIFGDDSNLIK	A8	801.099
						DMGIATGATIFGDDSNLIK	D1	1106.57
						DMGIATGATIFGDDSNLIK	D1	738.051
						FVDMFEAGIIDPTK	F5	619.329
						FVDMFEAGIIDPTK	M4	928.49
						FVDMFEAGIIDPTK	M4	508.312
						FVDMFEAGIIDPTK	M4	928.489
						FVDMFEAGIIDPTK	M4	619.329
						FVDMFEAGIIDPTK	M4	928.49
						FVDMFEAGIIDPTK	E6	619.329
						GVMNAVEVVVAELK	V2	866.001
						GVMNAVEVVVAELK	V2	866
						GVMNAVEVVVAELK	M3	866.001
						GVMNAVEVVVAELK	M3	866
						GVMNAVEVVVAELKK	V2	696.755
						GVMNAVEVVVAELKK	M3	696.755
						GVMNAVEVVVAELKK	M3	696.755
						GVMNAVEVVVAELKK	M3	696.756
						NVIIEQSWGSPK	W8	815.951
						QAMLVGVNLLADAVSVTMGPK	N8; P20	801.778
						QAMLVGVNLLADAVSVTMGPK	V5; P20	801.779
						QAMLVGVNLLADAVSVTMGPK	Q1; V16	801.779
						QAMLVGVNLLADAVSVTMGPK	A2; V16	801.779
						QAMLVGVNLLADAVSVTMGPK	A2; M18	801.779
						QAMLVGVNLLADAVSVTMGPK	A2; M18	801.779
						QAMLVGVNLLADAVSVTMGPK	L10; M18	801.779
						QAMLVGVNLLADAVSVTMGPK	Q1; M18	801.779
						QAMLVGVNLLADAVSVTMGPK	Q1; M18	801.779
						QAMLVGVNLLADAVSVTMGPK	Q1; M18	801.779
						QAMLVGVNLLADAVSVTMGPK	Q1; M18	801.778
						QAMLVGVNLLADAVSVTMGPK	L4; M18	801.779
						QAMLVGVNLLADAVSVTMGPK	L4; M18	801.779
						QAMLVGVNLLADAVSVTMGPK	V5; M18	801.779
						QAMLVGVNLLADAVSVTMGPK	V5; M18	801.779
						QAMLVGVNLLADAVSVTMGPK	L9; M18	801.779
						QAMLVGVNLLADAVSVTMGPK	L9; M18	801.778
						QAMLVGVNLLADAVSVTMGPK	V7; M18	801.779
						QAMLVGVNLLADAVSVTMGPK	V7; M18	801.779
						QAMLVGVNLLADAVSVTMGPK	V7; M18	801.778
						QAMLVGVNLLADAVSVTMGPK	M3; M18	801.779
						QAMLVGVNLLADAVSVTMGPK	M3; M18	801.779
						QAMLVGVNLLADAVSVTMGPK	N8; M18	801.779
						QAMLVGVNLLADAVSVTMGPK	N8; M18	801.779
						QAMLVGVNLLADAVSVTMGPK	N8; M18	801.778
						TLNDELELIEGMK	M12	593.32
A3QM98	COLlagen	col-138	DADAQQIPTADDFCFECEPSPVGPPGPPGPK	F13; P25; P27	1077.47	DADAQQIPTADDFCFECEPSPVGPPGPPGPK	P25; P27	1157.87
			DADAQQIPTADDFCFECEPSPVGPPGPPGPK	F13; P25; P27	1077.48	TVASPVGEPGEPGEQGPK	P9; P12	675.682
			DADAQQIPTADDFCFECEPSPVGPPGPPGPK	F13; P27; P28	1077.47	TVASPVGEPGEPGEQGPK	P12	670.351
			DADAQQIPTADDFCFECEPSPVGPPGPPGPK	F13; P27; P28	1077.48	TVASPVGEPGEPGEQGPK	P12	622.969
			DADAQQIPTADDFCFECEPSPVGPPGPPGPK	F15; P25; P27	1077.47	TVASPVGEPGEPGEQGPK	E11; E14	675.682
			DADAQQIPTADDFCFECEPSPVGPPGPPGPK	F15; P25; P27	1077.48	TVASPVGEPGEPGEQGPK	E11; E14	712.864
			DADAQQIPTADDFCFECEPSPVGPPGPPGPK	F15; P27; P28	1077.47	TVASPVGEPGEPGEQGPK	E14	670.351
			DADAQQIPTADDFCFECEPSPVGPPGPPGPK	F15; P27; P28	1077.48	TVASPVGEPGEPGEQGPK	E14	622.969
			DADAQQIPTADDFCFECEPSPVGPPGPPGPK	I7; P25; P27	1077.48
			DADAQQIPTADDFCFECEPSPVGPPGPPGPK	I7; P27; P28	1077.48
			GAPGPAGPVGADGEPGELGAPGAPGVQR	A2; V26	1235.6
			GAPGPAGPVGADGEPGELGAPGAPGVQR	A2; V26	1235.6
			GAPGPAGPVGADGEPGELGAPGAPGVQR	A2; V9; L18; V26	834.735
			GAPGPAGPVGADGEPGELGAPGAPGVQR	A6; A11; A20; V26	834.735
			GAPGPAGPVGADGEPGELGAPGAPGVQR	D12; E14; A23; V26	834.735
			GAPGPAGPVGADGEPGELGAPGAPGVQR	P3; P5; E17; V26	1251.6
			GAPGPAGPVGADGEPGELGAPGAPGVQR	P3; P5; E17; V26	834.735
			GAPGPAGPVGADGEPGELGAPGAPGVQR	P3; P5; E17; V26	1251.6
			GAPGPAGPVGADGEPGELGAPGAPGVQR	P3; V26	1235.6
			GAPGPAGPVGADGEPGELGAPGAPGVQR	P3; V26	1235.6
			GAPGPAGPVGADGEPGELGAPGAPGVQR	P3; V9; L18; V26	834.735
			GAPGPAGPVGADGEPGELGAPGAPGVQR	P5; V26	1235.6
			GAPGPAGPVGADGEPGELGAPGAPGVQR	P5; V26	1235.6
			GAPGPAGPVGADGEPGELGAPGAPGVQR	P8; P15; P21; V26	834.735
			GAPGPAGPVGADGEPGELGAPGAPGVQR	V9; A11; A20; V26	834.735
			GAPGPAGPVGADGEPGELGAPGAPGVQR	V9; A23; V26	1243.6
			GAPGPAGPVGADGEPGELGAPGAPGVQR	V9; D12; A23; V26	834.735
			GAPGPAGPVGADGEPGELGAPGAPGVQR	V9; L18; P21; P24	834.735
			GAPGPAGPVGADGEPGELGAPGAPGVQR	V9; P15; P21; P24	834.734
			GAPGPAGPVGADGEPGELGAPGAPGVQR	V9; P15; P21; P24	834.735
			GAPGPAGPVGADGEPGELGAPGAPGVQR	V9; P15; P21; P24	834.735
			GAPGPAGPVGADGEPGELGAPGAPGVQR	V9; P15; P21; P24	834.735
			GAPGPAGPVGADGEPGELGAPGAPGVQR	V9; P21; P24	1243.6
			GAPGPAGPVGADGEPGELGAPGAPGVQR	V9; P21; P24	829.399
			GAPGPAGPVGADGEPGELGAPGAPGVQR	V9; P21; P24	829.401
			GAPGPAGPVGADGEPGELGAPGAPGVQR	V9; P21; P24	1243.6
			GAPGPAGPVGADGEPGELGAPGAPGVQR	V9; P21; V26	1243.6
			GAPGPAGPVGADGEPGELGAPGAPGVQR	V9; P21; V26	829.399
			GAPGPAGPVGADGEPGELGAPGAPGVQR	V9; P21; V26	829.401
			GAPGPAGPVGADGEPGELGAPGAPGVQR	V9; P21; V26	1243.6
			TVASPVGEPGEPGEQGPK	E14	876.426
			TVASPVGEPGEPGEQGPK	E14	876.426
			TVASPVGEPGEPGEQGPK	P12	876.426
			TVASPVGEPGEPGEQGPK	P12	876.426
			TVASPVGEPGEPGEQGPK	P9; P12	884.427
O44989	COLlagen	col-49	GALGDQGETGPVGEIGDQGPPGSAGR	P20	1198.06	GSLGNPGQPGPDGVDGDNGVDGDVVIHDMPNPK	P6; P9; H27	883.668
			GALGDQGETGPVGEIGDQGPPGSAGR	P21	1198.06	GSLGNPGQPGPDGVDGDNGVDGDVVIHDMPNPK	P6; P9; M29	883.668
			GALGDQGETGPVGEIGDQGPPGSAGR	P21	799.046
			GALGDQGETGPVGEIGDQGPPGSAGR	P21	1198.06
			GALGDQGETGPVGEIGDQGPPGSAGR	P21	799.045
			GSLGNPGQPGPDGVDGDNGVDGDVVIHDMPNPK	L3; D17	1086.83
			GSLGNPGQPGPDGVDGDNGVDGDVVIHDMPNPK	L3; D21	1086.83
			GSLGNPGQPGPDGVDGDNGVDGDVVIHDMPNPK	L3; N18	1086.83
			GSLGNPGQPGPDGVDGDNGVDGDVVIHDMPNPK	N5; N18	1086.83
			GSLGNPGQPGPDGVDGDNGVDGDVVIHDMPNPK	N5; N18	1086.83
			GSLGNPGQPGPDGVDGDNGVDGDVVIHDMPNPK	N5; V14	1086.83
			GSLGNPGQPGPDGVDGDNGVDGDVVIHDMPNPK	N5; V14	1086.83
			GSLGNPGQPGPDGVDGDNGVDGDVVIHDMPNPK	N5; V20	1086.83
			GSLGNPGQPGPDGVDGDNGVDGDVVIHDMPNPK	N5; V20	1086.83
			GSLGNPGQPGPDGVDGDNGVDGDVVIHDMPNPK	P6; P9	1086.83
			GSLGNPGQPGPDGVDGDNGVDGDVVIHDMPNPK	P6; P9	1086.83
			GSLGNPGQPGPDGVDGDNGVDGDVVIHDMPNPK	P6; P9	1086.83
			GSLGNPGQPGPDGVDGDNGVDGDVVIHDMPNPK	P6; P9	1086.82
			GSLGNPGQPGPDGVDGDNGVDGDVVIHDMPNPK	P6; V14	1086.83
			GSLGNPGQPGPDGVDGDNGVDGDVVIHDMPNPK	P6; V14	1086.83
			GSLGNPGQPGPDGVDGDNGVDGDVVIHDMPNPK	P6; V14	1086.83
			GSLGNPGQPGPDGVDGDNGVDGDVVIHDMPNPK	P6; V14	1086.82
			GSLGNPGQPGPDGVDGDNGVDGDVVIHDMPNPK	P6; V20	1086.83
			GSLGNPGQPGPDGVDGDNGVDGDVVIHDMPNPK	P6; V20	1086.83
			GSLGNPGQPGPDGVDGDNGVDGDVVIHDMPNPK	P6; V20	1086.83
			GSLGNPGQPGPDGVDGDNGVDGDVVIHDMPNPK	Q8; V20	1086.83
			GSLGNPGQPGPDGVDGDNGVDGDVVIHDMPNPK	Q8; V20	1086.83
Q9N4U2	COLlagen	col-71	IGEPGATGETGENAENSEPTPGPQGPPGAIGPVGSR	A14; A29	1139.54	GAPGQAGYPGADGQPGSQGDNGEK	Q5; Y8; P15	840.718
			IGEPGATGETGENAENSEPTPGPQGPPGAIGPVGSR	A14; A29	1139.53	GAPGQAGYPGADGQPGSQGDNGEK	Q5; Y8; P15	840.72
			IGEPGATGETGENAENSEPTPGPQGPPGAIGPVGSR	A14; I30	1139.54	GAPGQAGYPGADGQPGSQGDNGEK	P3; P9; P15	840.72
			IGEPGATGETGENAENSEPTPGPQGPPGAIGPVGSR	A14; I30	1139.53	GAPGQAGYPGADGQPGSQGDNGEK	P3; P9; P15	840.72
			IGEPGATGETGENAENSEPTPGPQGPPGAIGPVGSR	A29	850.905	GAPGQAGYPGADGQPGSQGDNGEK	P3; P9; P15	840.718
			IGEPGATGETGENAENSEPTPGPQGPPGAIGPVGSR	A29	1134.21	GAPGQAGYPGADGQPGSQGDNGEK	P3; P9; P15	840.72
			IGEPGATGETGENAENSEPTPGPQGPPGAIGPVGSR	A29	1134.2	GAPGQAGYPGADGQPGSQGDNGEK	Y8	840.72
			IGEPGATGETGENAENSEPTPGPQGPPGAIGPVGSR	A29	850.904	GAPGQAGYPGADGQPGSQGDNGEK	P9; P15	835.389
			IGEPGATGETGENAENSEPTPGPQGPPGAIGPVGSR	A6; I30	1139.54	GAPGQAGYPGADGQPGSQGDNGEK	Q5; P9; P15	840.72
			IGEPGATGETGENAENSEPTPGPQGPPGAIGPVGSR	E12; I30	1139.54	GAPGQAGYPGADGQPGSQGDNGEK	Q5; P9; P15	840.72
			IGEPGATGETGENAENSEPTPGPQGPPGAIGPVGSR	E12; I30	1139.53	GAPGQAGYPGADGQPGSQGDNGEK	Q5; P9; P15	840.718
			IGEPGATGETGENAENSEPTPGPQGPPGAIGPVGSR	E15; I30	1139.53	GAPGQAGYPGADGQPGSQGDNGEK	Q5; P9; P15	840.72
			IGEPGATGETGENAENSEPTPGPQGPPGAIGPVGSR	E18; I30	1139.54
			IGEPGATGETGENAENSEPTPGPQGPPGAIGPVGSR	E18; I30	1139.53
			IGEPGATGETGENAENSEPTPGPQGPPGAIGPVGSR	E3; A29	1139.54
			IGEPGATGETGENAENSEPTPGPQGPPGAIGPVGSR	E3; A29	1139.53
			IGEPGATGETGENAENSEPTPGPQGPPGAIGPVGSR	E3; I30	1139.54
			IGEPGATGETGENAENSEPTPGPQGPPGAIGPVGSR	E3; I30	1139.53
			IGEPGATGETGENAENSEPTPGPQGPPGAIGPVGSR	E9; I30	1139.54
			IGEPGATGETGENAENSEPTPGPQGPPGAIGPVGSR	I1; P27	1139.54
			IGEPGATGETGENAENSEPTPGPQGPPGAIGPVGSR	I30	850.905
			IGEPGATGETGENAENSEPTPGPQGPPGAIGPVGSR	I30	1134.21
			IGEPGATGETGENAENSEPTPGPQGPPGAIGPVGSR	I30	850.904
			IGEPGATGETGENAENSEPTPGPQGPPGAIGPVGSR	N13; I30	1139.53
			IGEPGATGETGENAENSEPTPGPQGPPGAIGPVGSR	N16; I30	1139.53
			IGEPGATGETGENAENSEPTPGPQGPPGAIGPVGSR	P27	850.905
			IGEPGATGETGENAENSEPTPGPQGPPGAIGPVGSR	P27	1134.21
			IGEPGATGETGENAENSEPTPGPQGPPGAIGPVGSR	P27	1134.2
			IGEPGATGETGENAENSEPTPGPQGPPGAIGPVGSR	P27	850.904
			IGEPGATGETGENAENSEPTPGPQGPPGAIGPVGSR	P4; I30	1139.54
			IGEPGATGETGENAENSEPTPGPQGPPGAIGPVGSR	P4; I30	1139.53
P17140	Collagen alpha-2(IV) chain	let-2	DGLPGADGPVGPPGPSGPQNLVEPGEK	L3; P12	857.418	DGLPGADGPVGPPGPSGPQNLVEPGEK	L3; P13	943.149
			DGLPGADGPVGPPGPSGPQNLVEPGEK	L3; P13	857.418	DGLPGADGPVGPPGPSGPQNLVEPGEK	L3; P12	943.149
			DGLPGADGPVGPPGPSGPQNLVEPGEK	V10; P13	857.418	GTPGQSIPGLPGK	P3; P8; P11	757.424
			GLPGLPGAPGLR	P3; P6; L11	576.825
			GLPGLPGAPGLR	P3; P6; L11	576.822
			GLPGLPGAPGLR	P3; P6; P9	576.825
			GLPGLPGAPGLR	P3; P6; P9	576.822
			GPPGDSLNGLPGAPGQR	P3; P11; P14	819.398
			GPPGDSLNGLPGAPGQR	P3; P11; P14	819.399
			GTPGQSIPGLPGK	P3; P8; P11	628.828
P18831	Cuticle collagen 6	rol-8	DAEVLPAPASEPCIICPTGAPGPMGAMGPK	P21	964.451	DAEVLPAPASEPCIICPTGAPGPMGAMGPK	P12; C16	1060.85
			LIPVPGPQGAPGKPGPIGPPGPK	K13; I17	720.747	DAEVLPAPASEPCIICPTGAPGPMGAMGPK	P21; M24	1060.85
			LIPVPGPQGAPGKPGPIGPPGPK	K13; I17	720.744	DAEVLPAPASEPCIICPTGAPGPMGAMGPK	P12; M24	1060.85
			LIPVPGPQGAPGKPGPIGPPGPK	K13; I17	720.744	DAEVLPAPASEPCIICPTGAPGPMGAMGPK	P12; M24	1060.85
			LIPVPGPQGAPGKPGPIGPPGPK	K13; I17; K23	1088.61	DAEVLPAPASEPCIICPTGAPGPMGAMGPK	P12; M24	1060.85
			LIPVPGPQGAPGKPGPIGPPGPK	K13; K23	720.747	DAEVLPAPASEPCIICPTGAPGPMGAMGPK	E11; M24	1060.85
			LIPVPGPQGAPGKPGPIGPPGPK	K13; K23	720.744	DAEVLPAPASEPCIICPTGAPGPMGAMGPK	E11; M24	1060.85
			LIPVPGPQGAPGKPGPIGPPGPK	K13; K23	720.744	DAEVLPAPASEPCIICPTGAPGPMGAMGPK	P21; M27	641.384
			LIPVPGPQGAPGKPGPIGPPGPK	P11; I17	720.747	DAEVLPAPASEPCIICPTGAPGPMGAMGPK	P21; M27	1060.85
			LIPVPGPQGAPGKPGPIGPPGPK	P11; I17	720.744	DAEVLPAPASEPCIICPTGAPGPMGAMGPK	E11; M27	1060.85
			LIPVPGPQGAPGKPGPIGPPGPK	P11; I17	720.744	DAEVLPAPASEPCIICPTGAPGPMGAMGPK	E11; M27	1060.85
			LIPVPGPQGAPGKPGPIGPPGPK	P11; P14; I17	726.076	DAEVLPAPASEPCIICPTGAPGPMGAMGPK	E11; M27	1060.85
			LIPVPGPQGAPGKPGPIGPPGPK	P11; P14; I17	726.078	DAEVLPAPASEPCIICPTGAPGPMGAMGPK	P12; M27	1060.85
			LIPVPGPQGAPGKPGPIGPPGPK	P11; P14; P16	726.076	DAEVLPAPASEPCIICPTGAPGPMGAMGPK	P12; M27	1060.85
			LIPVPGPQGAPGKPGPIGPPGPK	P11; P14; P16	726.078	DAEVLPAPASEPCIICPTGAPGPMGAMGPK	P12; M27	1060.85
			LIPVPGPQGAPGKPGPIGPPGPK	P14; I17	720.744
			LIPVPGPQGAPGKPGPIGPPGPK	P14; P16	720.744
			LIPVPGPQGAPGKPGPIGPPGPK	P7; P11; I17	726.077
			LIPVPGPQGAPGKPGPIGPPGPK	P7; P11; P14; I17	731.405
			LIPVPGPQGAPGKPGPIGPPGPK	P7; P11; P14; I17	731.406
			LIPVPGPQGAPGKPGPIGPPGPK	V4; K13; K23	726.078
			LIPVPGPQGAPGKPGPIGPPGPK	V4; P11; P14; P16	731.405
			LIPVPGPQGAPGKPGPIGPPGPK	V4; P14; P16	726.077
P17657	Cuticle collagen dpy-13	dpy-13	GEPGSTGEPGPVGPPGPSGQPGNDGTPGQPGPK	P17; P21; P27	1004.46	GEPGSTGEPGPVGPPGPSGQPGNDGTPGQPGPK	Q20; P32	813.895
			GEPGSTGEPGPVGPPGPSGQPGNDGTPGQPGPK	P30	993.793
			GEPGSTGEPGPVGPPGPSGQPGNDGTPGQPGPK	Q20; P32	999.128
			GEPGSTGEPGPVGPPGPSGQPGNDGTPGQPGPK	Q20; P32	999.129
			GEPGSTGEPGPVGPPGPSGQPGNDGTPGQPGPK	Q20; P32	999.13
			GEPGSTGEPGPVGPPGPSGQPGNDGTPGQPGPK	Q20; P32	749.598
			GEPGSTGEPGPVGPPGPSGQPGNDGTPGQPGPK	Q20; P32	999.129
			GEPGSTGEPGPVGPPGPSGQPGNDGTPGQPGPK	Q20; P32	999.127
			GEPGSTGEPGPVGPPGPSGQPGNDGTPGQPGPK	Q20; Q29	999.128
			GEPGSTGEPGPVGPPGPSGQPGNDGTPGQPGPK	Q20; Q29	999.129
			GEPGSTGEPGPVGPPGPSGQPGNDGTPGQPGPK	Q20; Q29	999.13
			GEPGSTGEPGPVGPPGPSGQPGNDGTPGQPGPK	Q20; Q29	749.598
			GEPGSTGEPGPVGPPGPSGQPGNDGTPGQPGPK	Q20; Q29	999.129
			GEPGSTGEPGPVGPPGPSGQPGNDGTPGQPGPK	Q20; Q29	999.127
			GEPGSTGEPGPVGPPGPSGQPGNDGTPGQPGPK	V12; P21; P27	1004.46
			GEPGSTGEPGPVGPPGPSGQPGNDGTPGQPGPK	V12; P21; P27; P30	1009.79
			GEPGSTGEPGPVGPPGPSGQPGNDGTPGQPGPK	V12; P30	999.13
			GEPGSTGEPGPVGPPGPSGQPGNDGTPGQPGPK	V12; P30	999.127
			GEPGSTGEPGPVGPPGPSGQPGNDGTPGQPGPK	V12; Q20; P32	1004.46
			GEPGSTGEPGPVGPPGPSGQPGNDGTPGQPGPK	V12; Q20; P32	1004.46
			GEPGSTGEPGPVGPPGPSGQPGNDGTPGQPGPK	V12; Q20; Q29	1004.46
			GEPGSTGEPGPVGPPGPSGQPGNDGTPGQPGPK	V12; Q20; Q29	1004.46
			GEPGSTGEPGPVGPPGPSGQPGNDGTPGQPGPK	V12; Q20; Q29; P32	1009.79
			GPNGAPGKPGAPGAPGDEGLPAVCEPVQK	P6; P9; L20	905.781
			GPPGPDGKPGADGNPGQPGPVGPPGTPGER	D12; V21; E29	922.105
			GPPGPDGKPGADGNPGQPGPVGPPGTPGER	K8; E29	916.773
			GPPGPDGKPGADGNPGQPGPVGPPGTPGER	K8; V21; E29	922.105
			GPPGPDGKPGADGNPGQPGPVGPPGTPGER	P3; V21	916.773
			GPPGPDGKPGADGNPGQPGPVGPPGTPGER	P5; V21	916.773
			GPPGPDGKPGADGNPGQPGPVGPPGTPGER	Q17; V21; P27	922.105
P91285	Cuticle collagen dpy-5	dpy-5	NGPTGLPGLNIPIPNDFPK	L9	989.025	CPAGPPGQDGLPGQEGFQGLPGDAGK	P12; P21	913.786
			NGPTGLPGLNIPIPNDFPK	L9	989.027	NGPTGLPGLNIPIPNDFPK	P3	745.418
			NGPTGLPGLNIPIPNDFPK	L9	989.031	NGPTGLPGLNIPIPNDFPK	P3	640.895
			NGPTGLPGLNIPIPNDFPK	N10	989.025	NGPTGLPGLNIPIPNDFPK	P3	867.503
			NGPTGLPGLNIPIPNDFPK	P7	989.025	NGPTGLPGLNIPIPNDFPK	P3	745.418
			NGPTGLPGLNIPIPNDFPK	P7	659.688	NGPTGLPGLNIPIPNDFPK	L9	745.419
			NGPTGLPGLNIPIPNDFPK	P7	659.688	NGPTGLPGLNIPIPNDFPK	L9	745.418
			NGPTGLPGLNIPIPNDFPK	P7	989.027	NGPTGLPGLNIPIPNDFPK	L9	1021.5
			NGPTGLPGLNIPIPNDFPK	P7	659.685	NGPTGLPGLNIPIPNDFPK	L9	745.418
			NGPTGLPGLNIPIPNDFPK	P7	989.031	NGPTGLPGLNIPIPNDFPK	L9	640.895
			RSNSQCSCGLPSQGCPAGAPGNPGAPGEPGGTGPDGK	L10; P16; P20; P23	1143.81	NGPTGLPGLNIPIPNDFPK	L9	745.416
			VGDIGDQGTPGQDGQPGLAGPPGR	I4; L18; P22	1147.54	NGPTGLPGLNIPIPNDFPK	L9	745.419
			VGDIGDQGTPGQDGQPGLAGPPGR	I4; L18; R24	1147.54	NGPTGLPGLNIPIPNDFPK	L9	745.418
			VGDIGDQGTPGQDGQPGLAGPPGR	I4; P22	760.029	NGPTGLPGLNIPIPNDFPK	P7	745.419
			VGDIGDQGTPGQDGQPGLAGPPGR	P10; P16; P21	1147.54	NGPTGLPGLNIPIPNDFPK	P7	745.418
			VGDIGDQGTPGQDGQPGLAGPPGR	P10; P16; P21	765.361	NGPTGLPGLNIPIPNDFPK	P7	1021.5
			VGDIGDQGTPGQDGQPGLAGPPGR	P10; P16; P21	1147.54	NGPTGLPGLNIPIPNDFPK	P7	745.419
			VGDIGDQGTPGQDGQPGLAGPPGR	P10; P16; P21	765.359	NGPTGLPGLNIPIPNDFPK	P7	745.419
			VGDIGDQGTPGQDGQPGLAGPPGR	P10; P16; P21	1147.54	NGPTGLPGLNIPIPNDFPK	P7	745.418
			VGDIGDQGTPGQDGQPGLAGPPGR	P10; P16; P21	765.36	NGPTGLPGLNIPIPNDFPK	P7	640.895
			VGDIGDQGTPGQDGQPGLAGPPGR	P21	1131.54	NGPTGLPGLNIPIPNDFPK	P7	1117.62
			VGDIGDQGTPGQDGQPGLAGPPGR	P22	754.696	NGPTGLPGLNIPIPNDFPK	P7	745.416
			VGDIGDQGTPGQDGQPGLAGPPGR	P22	754.697	NGPTGLPGLNIPIPNDFPK	P7	745.418
			VGDIGDQGTPGQDGQPGLAGPPGR	P22	1131.54	NGPTGLPGLNIPIPNDFPK	P7	687.416
			VGDIGDQGTPGQDGQPGLAGPPGR	Q12; Q15; R24	765.36	NGPTGLPGLNIPIPNDFPK	P7	831.42
			VGDIGDQGTPGQDGQPGLAGPPGR	Q15; R24	1139.54	NGPTGLPGLNIPIPNDFPK	P7	867.503
			VGDIGDQGTPGQDGQPGLAGPPGR	Q15; R24	760.029	NGPTGLPGLNIPIPNDFPK	P7	745.417
			VGDIGDQGTPGQDGQPGLAGPPGR	Q15; R24	1139.54	NGPTGLPGLNIPIPNDFPK	P7	745.419
			VGDIGDQGTPGQDGQPGLAGPPGR	Q7; L18; P22	1147.54	NGPTGLPGLNIPIPNDFPK	P7	745.418
			VGDIGDQGTPGQDGQPGLAGPPGR	Q7; P22	1139.54	NGPTGLPGLNIPIPNDFPK	P7	1117.62
			VGDIGDQGTPGQDGQPGLAGPPGR	Q7; P22	760.029	NGPTGLPGLNIPIPNDFPK	P7	745.418
			VGDIGDQGTPGQDGQPGLAGPPGR	Q7; P22	1139.55	NGPTGLPGLNIPIPNDFPK	N1	867.503
			VGDIGDQGTPGQDGQPGLAGPPGR	Q7; P22	760.029	NGPTGLPGLNIPIPNDFPK	N1	745.418
			VGDIGDQGTPGQDGQPGLAGPPGR	Q7; P22	1139.54	NGPTGLPGLNIPIPNDFPK	N10	745.419
			VGDIGDQGTPGQDGQPGLAGPPGR	R24	754.696	NGPTGLPGLNIPIPNDFPK	N10	745.418
			VGDIGDQGTPGQDGQPGLAGPPGR	R24	754.697	NGPTGLPGLNIPIPNDFPK	N10	1021.5
			VGDIGDQGTPGQDGQPGLAGPPGR	R24	1131.54	NGPTGLPGLNIPIPNDFPK	N10	745.416
			VGDIGDQGTPGQDGQPGLAGPPGRDGLTGK	D13; L18; D25	955.796	NGPTGLPGLNIPIPNDFPK	N10	745.419
			VGDIGDQGTPGQDGQPGLAGPPGRDGLTGK	P10; P16; P21	955.796	NGPTGLPGLNIPIPNDFPK	N10	745.418
			VGDIGDQGTPGQDGQPGLAGPPGRDGLTGK	P10; P16; P21	955.798
P12114	Cuticle collagen sqt-1	sqt-1	GDQGPTGPAGQNGLHGPPGEPGTVGPEGPSGK	E20; V24	980.122	DGQPGHPGEQGSSGQIGK	H6; P7	675.666
			GDQGPTGPAGQNGLHGPPGEPGTVGPEGPSGK	E20; V24	980.123	DGQPGHPGEQGSSGQIGK	P4; P7	675.666
			GDQGPTGPAGQNGLHGPPGEPGTVGPEGPSGK	P18; P21	980.122	DGQPGHPGEQGSSGQIGK	P4; H6	675.666
			GDQGPTGPAGQNGLHGPPGEPGTVGPEGPSGK	P18; P21	980.124
			GDQGPTGPAGQNGLHGPPGEPGTVGPEGPSGK	P18; P21	980.125
			GDQGPTGPAGQNGLHGPPGEPGTVGPEGPSGK	P18; V24	980.122
			GDQGPTGPAGQNGLHGPPGEPGTVGPEGPSGK	P21	974.786
			GDQGPTGPAGQNGLHGPPGEPGTVGPEGPSGK	P21	974.792
			GDQGPTGPAGQNGLHGPPGEPGTVGPEGPSGK	P21	974.786
			GDQGPTGPAGQNGLHGPPGEPGTVGPEGPSGK	V24	974.786
			GDQGPTGPAGQNGLHGPPGEPGTVGPEGPSGK	V24	974.792
			GVPGVPGLDGVPGLDGVPGVGADDIAPQR	P3; P6; P12; V20	1373.2
			GVPGVPGLDGVPGLDGVPGVGADDIAPQR	P3; P6; P12; V20	915.797
			GVPGVPGLDGVPGLDGVPGVGADDIAPQR	P3; P6; P12; V20	915.795
			GVPGVPGLDGVPGLDGVPGVGADDIAPQR	P3; P6; P12; V20	1373.19
			GVPGVPGLDGVPGLDGVPGVGADDIAPQR	P3; P6; V17; V20	1373.2
			GVPGVPGLDGVPGLDGVPGVGADDIAPQR	P3; P6; V17; V20	915.797
			GVPGVPGLDGVPGLDGVPGVGADDIAPQR	P3; P6; V17; V20	915.797
			GVPGVPGLDGVPGLDGVPGVGADDIAPQR	P3; P6; V17; V20	915.795
			GVPGVPGLDGVPGLDGVPGVGADDIAPQR	P3; V11; V17; V20	915.797
			GVPGVPGLDGVPGLDGVPGVGADDIAPQR	V2; L8; L14; P18	1373.2
			GVPGVPGLDGVPGLDGVPGVGADDIAPQR	V2; L8; L14; P18	915.797
			GVPGVPGLDGVPGLDGVPGVGADDIAPQR	V2; L8; L14; P18	915.795
			GVPGVPGLDGVPGLDGVPGVGADDIAPQR	V2; L8; L14; P18	1373.19
			GVPGVPGLDGVPGLDGVPGVGADDIAPQR	V2; P6; P12; P18	1373.2
			GVPGVPGLDGVPGLDGVPGVGADDIAPQR	V2; P6; P12; P18	915.797
			GVPGVPGLDGVPGLDGVPGVGADDIAPQR	V2; P6; P12; P18	915.795
			GVPGVPGLDGVPGLDGVPGVGADDIAPQR	V2; P6; P12; P18	1373.19
			GVPGVPGLDGVPGLDGVPGVGADDIAPQR	V2; V5; L14; P18	1373.19
			GVPGVPGLDGVPGLDGVPGVGADDIAPQR	V2; V5; P12; P18	1373.19
D4YWC3	DAF-16/FOXO Controlled, germline Tumor affecting	dct-16	MIGETNEYIK	I2	607.293	MIGETNEYIK	M1	735.889
			MIGETNEYIK	M1	607.293	MIGETNEYIK	M1	735.889
			MIGETNEYIK	M1	607.293	MIGETNEYIK	M1	667.035
			MIGETNEYIK	M1	607.291	MIGETNEYIK	M1	654.02
						MIGETNEYIK	M1	735.889
						MIGETNEYIK	M1	735.889
						MIGETNEYIK	M1	451.52
						MIGETNEYIK	M1	735.89
						MIGETNEYIK	M1	812.083
						MIGETNEYIK	M1	528.321
						MIGETNEYIK	M1	735.89
						MIGETNEYIK	M1	744.757
						MIGETNEYIK	M1	735.89
						MIGETNEYIK	M1	672.878
						MIGETNEYIK	M1	735.89
						MIGETNEYIKGQSEADQK	M1	642.872
						MIGETNEYIKGQSEADQK	M1	678.849
						MIGETNEYIKGQSEADQK	M1	781.064
						MIGETNEYIKGQSEADQK	M1	848.441
						MIGETNEYIKGQSEADQK	M1	554.988
						MIGETNEYIKGQSEADQK	I2	678.849
						MIGETNEYIKGQSEADQK	I2	848.441
						MTAAGLSPESIEGILK	M1	945.518
						MTAAGLSPESIEGILK	M1	945.528
						MTAAGLSPESIEGILK	M1	621.362
Q9XX57	DAF-16/FOXO Controlled, germline Tumor affecting	dct-16	AKEEMTAAGLSPESIEGILK	A1	697.361	AKEEMTAAGLSPESIEGILK	M5	859.479
			AKEEMTAAGLSPESIEGILK	A1	697.361	AKEEMTAAGLSPESIEGILK	M5	859.479
			AKEEMTAAGLSPESIEGILK	A7	1045.53	AKEEMTAAGLSPESIEGILK	M5	859.479
			AKEEMTAAGLSPESIEGILK	A7	1045.54	AKEEMTAAGLSPESIEGILK	M5	859.48
			AKEEMTAAGLSPESIEGILK	A7	697.361	AKEEMTAAGLSPESIEGILK	M5	859.481
			AKEEMTAAGLSPESIEGILK	E3	697.361	AKEEMTAAGLSPESIEGILK	M5	859.481
			AKEEMTAAGLSPESIEGILK	E3	697.361	AKEEMTAAGLSPESIEGILK	M5	864.818
			AKEEMTAAGLSPESIEGILK	E4	1045.53	AKEEMTAAGLSPESIEGILK	M5	859.48
			AKEEMTAAGLSPESIEGILK	E4	1045.54	AKEEMTAAGLSPESIEGILK	M5	783.095
			AKEEMTAAGLSPESIEGILK	E4	697.361	AKEEMTAAGLSPESIEGILK	M5	783.094
			AKEEMTAAGLSPESIEGILK	E4	697.361	AKEEMTAAGLSPESIEGILK	M5	783.094
			AKEEMTAAGLSPESIEGILK	K2	697.361	AKEEMTAAGLSPESIEGILK	M5	783.093
			AKEEMTAAGLSPESIEGILK	K2	697.361	AKEEMTAAGLSPESIEGILK	M5	783.093
			AKEEMTAAGLSPESIEGILK	M5	1045.53	AKEEMTAAGLSPESIEGILK	M5	783.093
			AKEEMTAAGLSPESIEGILK	M5	1045.54	AKEEMTAAGLSPESIEGILK	M5	783.093
			AKEEMTAAGLSPESIEGILK	M5	697.361	AKEEMTAAGLSPESIEGILK	M5	859.481
			AKEEMTAAGLSPESIEGILK	M5	697.361	AKEEMTAAGLSPESIEGILK	M5	859.48
			EEMTAAGLSPESIEGILK	E1	945.975	AKEEMTAAGLSPESIEGILK	M5	859.479
			EEMTAAGLSPESIEGILK	E1	945.975	AKEEMTAAGLSPESIEGILK	M5	783.092
			EEMTAAGLSPESIEGILK	E2	945.975	AKEEMTAAGLSPESIEGILK	M5	859.481
			EEMTAAGLSPESIEGILK	E2	945.975	AKEEMTAAGLSPESIEGILK	M5	859.481
			EEMTAAGLSPESIEGILK	M3	945.975	AKEEMTAAGLSPESIEGILK	M5	859.479
			EEMTAAGLSPESIEGILK	M3	945.975	AKEEMTAAGLSPESIEGILK	M5	783.092
			MIGETNEYIK	I2	607.293	AKEEMTAAGLSPESIEGILK	M5	644.862
			MIGETNEYIK	M1	607.293	AKEEMTAAGLSPESIEGILK	M5	859.479
			MIGETNEYIK	M1	607.293	AKEEMTAAGLSPESIEGILK	M5	864.812
			MIGETNEYIK	M1	607.291	AKEEMTAAGLSPESIEGILK	M5	859.481
						AKEEMTAAGLSPESIEGILK	M5	864.814
						AKEEMTAAGLSPESIEGILK	M5	864.812
						AKEEMTAAGLSPESIEGILK	M5	864.811
						AKEEMTAAGLSPESIEGILK	M5	864.813
						AKEEMTAAGLSPESIEGILK	M5	859.48
						AKEEMTAAGLSPESIEGILK	E4	859.479
						AKEEMTAAGLSPESIEGILK	E4	859.479
						AKEEMTAAGLSPESIEGILK	E4	859.479
						AKEEMTAAGLSPESIEGILK	E4	859.48
						AKEEMTAAGLSPESIEGILK	E4	859.481
						AKEEMTAAGLSPESIEGILK	E4	859.481
						AKEEMTAAGLSPESIEGILK	E4	859.48
						AKEEMTAAGLSPESIEGILK	E4	783.094
						AKEEMTAAGLSPESIEGILK	E4	783.093
						AKEEMTAAGLSPESIEGILK	E4	783.093
						AKEEMTAAGLSPESIEGILK	E4	783.093
						AKEEMTAAGLSPESIEGILK	E4	859.481
						AKEEMTAAGLSPESIEGILK	E4	859.48
						AKEEMTAAGLSPESIEGILK	E4	859.479
						AKEEMTAAGLSPESIEGILK	E4	859.479
						AKEEMTAAGLSPESIEGILK	E4	644.862
						AKEEMTAAGLSPESIEGILK	E4	859.479
						AKEEMTAAGLSPESIEGILK	E4	859.481
						AKEEMTAAGLSPESIEGILK	E4	859.48
						AKEEMTAAGLSPESIEGILK	E3; E4	864.818
						AKEEMTAAGLSPESIEGILK	A1	859.479
						AKEEMTAAGLSPESIEGILK	A1	859.479
						AKEEMTAAGLSPESIEGILK	A1	859.479
						AKEEMTAAGLSPESIEGILK	A1	859.48
						AKEEMTAAGLSPESIEGILK	A1	859.481
						AKEEMTAAGLSPESIEGILK	A1	783.093
						AKEEMTAAGLSPESIEGILK	A1	859.481
						AKEEMTAAGLSPESIEGILK	A1	859.48
						AKEEMTAAGLSPESIEGILK	A1	1171.67
						AKEEMTAAGLSPESIEGILK	A1	783.094
						AKEEMTAAGLSPESIEGILK	A1	783.093
						AKEEMTAAGLSPESIEGILK	A1	859.481
						AKEEMTAAGLSPESIEGILK	A1	859.48
						AKEEMTAAGLSPESIEGILK	A1	859.479
						AKEEMTAAGLSPESIEGILK	A1	859.481
						AKEEMTAAGLSPESIEGILK	A1	859.481
						AKEEMTAAGLSPESIEGILK	A1	859.479
						AKEEMTAAGLSPESIEGILK	A1	859.479
						AKEEMTAAGLSPESIEGILK	A1	859.481
						AKEEMTAAGLSPESIEGILK	A1	859.48
						AKEEMTAAGLSPESIEGILK	A1; A7	864.818
						AKEEMTAAGLSPESIEGILK	A1; A7	864.814
						AKEEMTAAGLSPESIEGILK	A1; A7	864.812
						AKEEMTAAGLSPESIEGILK	A1; A7	864.814
						AKEEMTAAGLSPESIEGILK	A1; A7	864.812
						AKEEMTAAGLSPESIEGILK	E3; A8	864.814
						AKEEMTAAGLSPESIEGILK	A1; L10	864.814
						AKEEMTAAGLSPESIEGILK	E3; M5	864.818
						AKEEMTAAGLSPESIEGILK	E3; M5	864.812
						AKEEMTAAGLSPESIEGILK	A1; M5	864.818
						AKEEMTAAGLSPESIEGILK	A1; M5	864.812
						AKEEMTAAGLSPESIEGILK	A1; M5	864.812
						AKEEMTAAGLSPESIEGILK	A1; M5	864.811
						AKEEMTAAGLSPESIEGILK	A1; M5	864.813
						AKEEMTAAGLSPESIEGILK	E4; M5	864.812
						AKEEMTAAGLSPESIEGILK	A7	859.479
						AKEEMTAAGLSPESIEGILK	A7	859.48
						AKEEMTAAGLSPESIEGILK	A7	859.481
						AKEEMTAAGLSPESIEGILK	A7	859.481
						AKEEMTAAGLSPESIEGILK	A7	859.48
						AKEEMTAAGLSPESIEGILK	A7	783.093
						AKEEMTAAGLSPESIEGILK	A7	859.481
						AKEEMTAAGLSPESIEGILK	A7	859.48
						AKEEMTAAGLSPESIEGILK	A7	859.479
						AKEEMTAAGLSPESIEGILK	A7	783.092
						AKEEMTAAGLSPESIEGILK	A7	859.481
						AKEEMTAAGLSPESIEGILK	A7	859.481
						AKEEMTAAGLSPESIEGILK	A7	859.479
						AKEEMTAAGLSPESIEGILK	A7	783.092
						AKEEMTAAGLSPESIEGILK	A7	644.862
						AKEEMTAAGLSPESIEGILK	A7	859.479
						AKEEMTAAGLSPESIEGILK	A7	859.481
						AKEEMTAAGLSPESIEGILK	A7	783.093
						AKEEMTAAGLSPESIEGILK	A7	859.48
						AKEEMTAAGLSPESIEGILK	L10	783.092
						AKEEMTAAGLSPESIEGILK	L10	783.095
						AKEEMTAAGLSPESIEGILK	L10	783.092
						AKEEMTAAGLSPESIEGILK	L10	696.047
						AKEEMTAAGLSPESIEGILK	L10	783.092
						AKEEMTAAGLSPESIEGILK	L10	783.093
						AKEEMTAAGLSPESIEGILK	L10	783.093
						AKEEMTAAGLSPESIEGILK	L10	783.093
						AKEEMTAAGLSPESIEGILK	A7; A8	864.812
						AKEEMTAAGLSPESIEGILK	M5; A7	864.812
						AKEEMTAAGLSPESIEGILK	A8	783.092
						AKEEMTAAGLSPESIEGILK	A8	783.092
						AKEEMTAAGLSPESIEGILK	A8	859.481
						AKEEMTAAGLSPESIEGILK	A8	783.092
						AKEEMTAAGLSPESIEGILK	E3	859.479
						AKEEMTAAGLSPESIEGILK	E3	859.479
						AKEEMTAAGLSPESIEGILK	E3	859.479
						AKEEMTAAGLSPESIEGILK	E3	859.48
						AKEEMTAAGLSPESIEGILK	E3	859.481
						AKEEMTAAGLSPESIEGILK	E3	783.093
						AKEEMTAAGLSPESIEGILK	E3	859.481
						AKEEMTAAGLSPESIEGILK	E3	644.862
						AKEEMTAAGLSPESIEGILK	E3	859.48
						AKEEMTAAGLSPESIEGILK	E3	1171.67
						AKEEMTAAGLSPESIEGILK	E3	783.094
						AKEEMTAAGLSPESIEGILK	E3	783.093
						AKEEMTAAGLSPESIEGILK	E3	783.093
						AKEEMTAAGLSPESIEGILK	E3	783.093
						AKEEMTAAGLSPESIEGILK	E3	859.481
						AKEEMTAAGLSPESIEGILK	E3	644.862
						AKEEMTAAGLSPESIEGILK	E3	859.48
						AKEEMTAAGLSPESIEGILK	E3	859.479
						AKEEMTAAGLSPESIEGILK	E3	644.863
						AKEEMTAAGLSPESIEGILK	E3	859.481
						AKEEMTAAGLSPESIEGILK	E3	859.479
						AKEEMTAAGLSPESIEGILK	E3	644.862
						AKEEMTAAGLSPESIEGILK	E3	644.862
						AKEEMTAAGLSPESIEGILK	E3	859.479
						AKEEMTAAGLSPESIEGILK	E3	859.481
						EEMTAAGLSPESIEGILK	E2	1074.57
						EEMTAAGLSPESIEGILK	E2	1074.57
						EEMTAAGLSPESIEGILK	E2	716.715
						EEMTAAGLSPESIEGILK	E2	716.716
						EEMTAAGLSPESIEGILK	E2	716.715
						EEMTAAGLSPESIEGILK	M3	1053.55
						EEMTAAGLSPESIEGILK	M3	1074.57
						EEMTAAGLSPESIEGILK	M3	682.885
						EEMTAAGLSPESIEGILK	M3	1074.57
						EEMTAAGLSPESIEGILK	M3	1074.57
						EEMTAAGLSPESIEGILK	M3	1074.57
						EEMTAAGLSPESIEGILK	M3	716.715
						EEMTAAGLSPESIEGILK	M3	716.716
						EEMTAAGLSPESIEGILK	M3	716.715
						EEMTAAGLSPESIEGILK	M3	716.716
						EEMTAAGLSPESIEGILK	L8	716.716
						EEMTAAGLSPESIEGILK	A6	716.715
						EEMTAAGLSPESIEGILK	A6	716.716
						EEMTAAGLSPESIEGILK	A6	716.715
						EEMTAAGLSPESIEGILK	A5	716.715
						EEMTAAGLSPESIEGILK	A5	716.716
						EEMTAAGLSPESIEGILK	A5	716.715
						EEMTAAGLSPESIEGILK	E1	1074.57
						EEMTAAGLSPESIEGILK	E1	682.885
						EEMTAAGLSPESIEGILK	E1	1074.57
						EEMTAAGLSPESIEGILK	E1	1074.57
						EEMTAAGLSPESIEGILK	E1	716.715
						EEMTAAGLSPESIEGILK	E1	716.716
						MIGETNEYIK	M1	735.889
						MIGETNEYIK	M1	735.889
						MIGETNEYIK	M1	667.035
						MIGETNEYIK	M1	654.02
						MIGETNEYIK	M1	735.889
						MIGETNEYIK	M1	735.889
						MIGETNEYIK	M1	451.52
						MIGETNEYIK	M1	735.89
						MIGETNEYIK	M1	812.083
						MIGETNEYIK	M1	528.321
						MIGETNEYIK	M1	735.89
						MIGETNEYIK	M1	744.757
						MIGETNEYIK	M1	735.89
						MIGETNEYIK	M1	672.878
						MIGETNEYIK	M1	735.89
						MIGETNEYIKGQSEADQK	M1	642.872
						MIGETNEYIKGQSEADQK	M1	678.849
						MIGETNEYIKGQSEADQK	M1	781.064
						MIGETNEYIKGQSEADQK	M1	848.441
						MIGETNEYIKGQSEADQK	M1	554.988
						MIGETNEYIKGQSEADQK	I2	678.849
						MIGETNEYIKGQSEADQK	I2	848.441
Q18345	DumPY: shorter than wild-type	dpy-8	GPLGPYGPPGDTVVAGVGIK	D11	934.004	GPLGPYGPPGDTVVAGVGIK	Y6	921.472
			GPLGPYGPPGDTVVAGVGIK	P9	934.004	GPLGPYGPPGDTVVAGVGIK	Y6	708.734
			GPLGPYGPPGDTVVAGVGIK	V13	934.004	GPLGPYGPPGDTVVAGVGIK	P5	708.734
						GPLGPYGPPGDTVVAGVGIK	L3	921.472
						GPLGPYGPPGDTVVAGVGIK	L3	708.734
						GPLGPYGPPGDTVVAGVGIK	P2	921.472
						GPLGPYGPPGDTVVAGVGIK	P2	708.734
P53013	Elongation factor 1-alpha	eft-3	IGGIGTVPVGR	V7	521.302	FEKEAQEMGK	M8	566.976
						FEKEAQEMGK	M8	566.977
						NMITGTSQADCAVLVVACGTGEFEAGISK	Q8	1048.51
						NMITGTSQADCAVLVVACGTGEFEAGISK	V15	1048.51
						NMITGTSQADCAVLVVACGTGEFEAGISK	V13	1048.51
						NMITGTSQADCAVLVVACGTGEFEAGISK	L14	1048.51
						NMITGTSQADCAVLVVACGTGEFEAGISK	V16	1048.51
						NMITGTSQADCAVLVVACGTGEFEAGISK	V16	1048.51
						NMITGTSQADCAVLVVACGTGEFEAGISK	I3	1048.51
						QLIVACNK	C6	597.342
						QLIVACNK	C6	597.341
						VETGIIKPGMVVTFAPQNVTTEVK	V11	687.403
						VETGIIKPGMVVTFAPQNVTTEVK	V11	1020.92
						VETGIIKPGMVVTFAPQNVTTEVK	V11	633.689
						VETGIIKPGMVVTFAPQNVTTEVK	V11	944.532
						VETGIIKPGMVVTFAPQNVTTEVK	V11	944.53
						VETGIIKPGMVVTFAPQNVTTEVK	V11	809.428
						VETGIIKPGMVVTFAPQNVTTEVK	V11	1088.61
						VETGIIKPGMVVTFAPQNVTTEVK	V11	823.467
						VETGIIKPGMVVTFAPQNVTTEVK	V11	844.994
						VETGIIKPGMVVTFAPQNVTTEVK	V11	765.941
						VETGIIKPGMVVTFAPQNVTTEVK	V11	494.344
						VETGIIKPGMVVTFAPQNVTTEVK	V11	718.352
						VETGIIKPGMVVTFAPQNVTTEVK	V11	637.371
						VETGIIKPGMVVTFAPQNVTTEVK	M10	687.403
						VETGIIKPGMVVTFAPQNVTTEVK	M10	1020.92
						VETGIIKPGMVVTFAPQNVTTEVK	M10	688.064
						VETGIIKPGMVVTFAPQNVTTEVK	M10	633.689
						VETGIIKPGMVVTFAPQNVTTEVK	M10	944.532
						VETGIIKPGMVVTFAPQNVTTEVK	M10	944.53
						VETGIIKPGMVVTFAPQNVTTEVK	M10	589.853
						VETGIIKPGMVVTFAPQNVTTEVK	M10	809.428
						VETGIIKPGMVVTFAPQNVTTEVK	M10	1088.61
						VETGIIKPGMVVTFAPQNVTTEVK	M10	823.467
						VETGIIKPGMVVTFAPQNVTTEVK	M10	844.994
						VETGIIKPGMVVTFAPQNVTTEVK	M10	765.941
						VETGIIKPGMVVTFAPQNVTTEVK	M10	494.344
						VETGIIKPGMVVTFAPQNVTTEVK	M10	718.352
						VETGIIKPGMVVTFAPQNVTTEVK	M10	637.371
						VETGIIKPGMVVTFAPQNVTTEVK	P8	687.403
						VETGIIKPGMVVTFAPQNVTTEVK	P8	1020.92
						VETGIIKPGMVVTFAPQNVTTEVK	P8	688.064
						VETGIIKPGMVVTFAPQNVTTEVK	P8	633.689
						VETGIIKPGMVVTFAPQNVTTEVK	P8	944.532
						VETGIIKPGMVVTFAPQNVTTEVK	P8	944.53
						VETGIIKPGMVVTFAPQNVTTEVK	P8	589.853
						VETGIIKPGMVVTFAPQNVTTEVK	P8	809.428
						VETGIIKPGMVVTFAPQNVTTEVK	P8	1088.61
						VETGIIKPGMVVTFAPQNVTTEVK	P8	823.467
						VETGIIKPGMVVTFAPQNVTTEVK	P8	844.994
						VETGIIKPGMVVTFAPQNVTTEVK	P8	765.941
						VETGIIKPGMVVTFAPQNVTTEVK	P8	494.344
						VETGIIKPGMVVTFAPQNVTTEVK	P8	637.371
						VETGIIKPGMVVTFAPQNVTTEVK	F14	823.467
						VETGIIKPGMVVTFAPQNVTTEVK	V12	823.467
						VETGIIKPGMVVTFAPQNVTTEVK	V12	718.352
Q9BI71	EPsiN (Endocytic protein) homolog	epn-1	AAQGQAPPIPSMAPR	A13	754.39	LQMALEESQK	M3	725.394
			AAQGQAPPIPSMAPR	M12	754.39	LQMALEESQK	M3	725.394
			AAQGQAPPIPSMAPR	P10	754.39	LQMALEESQK	M3	725.395
			AAQGQAPPIPSMAPR	P14	754.39
			AAQGQAPPIPSMAPR	R15	754.39
Q9XWP7	Eukaryotic Initiation Factor	eif-3.j	AAPTFAMESLGR	E8	633.811	LLTSVTDEMTPAEILK	M9	636.884
			AAPTFAMESLGR	M7	633.81	LLTSVTDEMTPAEILK	M9	539.312
			AAPTFAMESLGR	M7	633.811	LLTSVTDEMTPAEILK	M9	719.054
			LLTSVTDEMTPAEILK	E8	888.972	LLTSVTDEMTPAEILK	M9	638.895
			LLTSVTDEMTPAEILK	M9	888.97	LLTSVTDEMTPAEILK	M9	1017.57
			LLTSVTDEMTPAEILK	M9	888.972	LLTSVTDEMTPAEILK	M9	626.868
						LLTSVTDEMTPAEILK	E8	636.884
						LLTSVTDEMTPAEILK	E8	539.312
						MVTFLQQISAAK	M1	601.843
						MVTFLQQISAAK	M1	676.73
						MVTFLQQISAAK	M1	682.885
						MVTFLQQISAAK	M1	805.463
						MVTFLQQISAAK	M1	805.463
						MVTFLQQISAAK	M1	805.463
						MVTFLQQISAAK	V2	601.843
						MVTFLQQISAAK	V2	682.885
						MVTFLQQISAAK	V2	805.463
						TYANIMSK	M6	515.293
						TYANIMSK	M6	598.295
						TYANIMSK	M6	709.878
P54216	Fructose-bisphosphate aldolase 1	aldo-1	GVVPMAGTIGEGTTQGLDDLNAR	A6	1144.56	GILAADESTGSMDK	M12	482.637
			GVVPMAGTIGEGTTQGLDDLNAR	M5	1144.56
			GVVPMAGTIGEGTTQGLDDLNAR	P4	1144.56
			GVVPMAGTIGEGTTQGLDDLNAR	V3	1144.56
G4SI07	GEX Interacting protein	gei-15	TMFYSPIGDGTVAADGYELK	M2	1076	TMFYSPIGDGTVAADGYELK	P6	803.403
						TMFYSPIGDGTVAADGYELK	F3	803.403
						TMFYSPIGDGTVAADGYELK	F3	1204.6
						TMFYSPIGDGTVAADGYELK	Y4	803.403
						TMFYSPIGDGTVAADGYELK	I7	803.403
						TMFYSPIGDGTVAADGYELK	M2	803.403
						TMFYSPIGDGTVAADGYELK	M2	1204.6
O16462	GRounDhog (Hedgehog-like family)	grd-5	GAMGGDDLLGSADSIQK	A2	825.888	GAMGGDDLLGSADSIQK	M3	954.48
			GAMGGDDLLGSADSIQK	A2	1092.16	GAMGGDDLLGSADSIQK	M3	954.483
			GAMGGDDLLGSADSIQK	M3	825.888	GAMGGDDLLGSADSIQK	M3	636.657
			GAMGGDDLLGSADSIQK	M3	1092.16	GAMGGDDLLGSADSIQK	L8	636.657
						GAMGGDDLLGSADSIQK	A2	954.48
						GAMGGDDLLGSADSIQK	A2	954.483
						GAMGGDDLLGSADSIQK	A2	636.657
						GAMGGDDLLGSADSIQK	D6	636.657
Q05036	Heat shock protein 110	hsp-110	NSLEEYVYEMR	M10	724.822	IVEEVPAEAMEVDGDAK	A9	731.753
						IVEEVPAEAMEVDGDAK	A9	575.666
						IVEEVPAEAMEVDGDAK	M10	731.753
						IVEEVPAEAMEVDGDAK	M10	575.666
						IVEEVPAEAMEVDGDAK	M10	1038.03
						IVEEVPAEAMEVDGDAK	M10	1038.03
						IVEEVPAEAMEVDGDAK	E11	731.753
						IVEEVPAEAMEVDGDAK	E11	575.666
						IVEEVPAEAMEVDGDAK	E11	1038.03
Q22037	Heterogeneous nuclear ribonucleoprotein A1	hrp-1	IFVGGLTSNTTDDLMR	M15	878.429	EDHTEDMLTEYFTK	H3	677.986
						EDHTEDMLTEYFTK	H3	1060.5
						EDHTEDMLTEYFTK	M7	677.986
						EDHTEDMLTEYFTK	M7	1060.5
						EDHTEDMLTEYFTK	L8	1060.5
						EDHTEDMLTEYFTK	E1	677.986
						EDHTEDMLTEYFTK	D2	677.986
						EDHTEDMLTEYFTK	E5	1060.5
						TEVDAAMK	M7	569.305
						TEVDAAMK	M7	569.305
P62784	Histone H4	his-1	TVTAMDVVYALK	M5	663.854	DAVTYCEHAK	C6	721.345
						DAVTYCEHAK	C6	721.346
						DAVTYCEHAK	C6	721.345
						DAVTYCEHAK	C6	721.345
						DAVTYCEHAK	C6	721.346
						DAVTYCEHAK	C6	721.347
						KTVTAMDVVYALK	V3	647.722
						KTVTAMDVVYALK	V3	647.721
						KTVTAMDVVYALK	A5	915.995
						KTVTAMDVVYALK	A5	647.722
						KTVTAMDVVYALK	A5	647.722
						KTVTAMDVVYALK	A5	654.376
						KTVTAMDVVYALK	A5	647.722
						KTVTAMDVVYALK	A5	647.722
						KTVTAMDVVYALK	V8	647.722
						KTVTAMDVVYALK	D7	647.722
						KTVTAMDVVYALK	D7	647.722
						KTVTAMDVVYALK	M6	654.376
						KTVTAMDVVYALK	M6	647.722
						KTVTAMDVVYALK	M6	647.721
						KTVTAMDVVYALK	M6	647.722
						KTVTAMDVVYALK	M6	882.967
						TVTAMDVVYALK	V2	528.636
						TVTAMDVVYALK	M5	792.451
						TVTAMDVVYALK	M5	792.452
						TVTAMDVVYALK	M5	792.45
						TVTAMDVVYALK	M5	792.45
						TVTAMDVVYALK	M5	648.874
						TVTAMDVVYALK	M5	840.821
						TVTAMDVVYALK	M5	528.636
						TVTAMDVVYALK	A4	528.636
						TVTAMDVVYALK	D6	792.452
						TVTAMDVVYALK	D6	528.636
Q18581	Inactive angiotensin-converting enzyme-related protein	acn-1	LALDEAENVLTMFVR	F13	868.951	QFDMASVTDEK	M4	772.378
			LALDEAENVLTMFVR	M12	868.951	QFDMASVTDEK	M4	772.38
			LALDEAENVLTMFVR	M12	868.947
			LALDEAENVLTMFVR	V14	868.951
P90901	Intermediate filament protein ifa-1	ifa-1	NMYEGELVDAQK	N1	706.823	NMYEGELVDAQK	N1	557.282
						NMYEGELVDAQK	Y3	557.282
						NMYEGELVDAQK	M2	654.02
						NMYEGELVDAQK	M2	835.418
						NMYEGELVDAQK	M2	712.035
						NMYEGELVDAQK	M2	557.282
Q19289	Intermediate filament protein ifb-1	ifb-1	IDFQNQVQTLMEELEFLR	L10	1135.06	MVTEMGSATVGGISPALSANAAK	M5	818.096
			IDFQNQVQTLMEELEFLR	L10	1135.06	MVTEMGSATVGGISPALSANAAK	M5	818.093
			IDFQNQVQTLMEELEFLR	M11	1135.06	MVTEMGSATVGGISPALSANAAK	M5	818.094
			IDFQNQVQTLMEELEFLR	M11	1135.06	MVTEMGSATVGGISPALSANAAK	M5	699.398
			IDFQNQVQTLMEELEFLR	Q6	1135.06	MVTEMGSATVGGISPALSANAAK	M5	818.093
			IDFQNQVQTLMEELEFLR	Q8	1135.06	MVTEMGSATVGGISPALSANAAK	V2; M5	818.096
			IDFQNQVQTLMEELEFLR	Q8	1135.06	MVTEMGSATVGGISPALSANAAK	V2; M5	818.093
			IDFQNQVQTLMEELEFLR	V7	1135.06	MVTEMGSATVGGISPALSANAAK	V2; M5	818.094
			ISQWTNAIADAQSEVEMLR	E14	1089.53	MVTEMGSATVGGISPALSANAAK	V2; M5	699.398
			ISQWTNAIADAQSEVEMLR	E16	1089.53	MVTEMGSATVGGISPALSANAAK	V2; A8	818.094
			ISQWTNAIADAQSEVEMLR	E16	1089.53	MVTEMGSATVGGISPALSANAAK	E4; M5	818.096
			ISQWTNAIADAQSEVEMLR	L18	1089.53	MVTEMGSATVGGISPALSANAAK	E4; M5	818.093
			ISQWTNAIADAQSEVEMLR	L18	1089.53	MVTEMGSATVGGISPALSANAAK	E4; M5	818.094
			ISQWTNAIADAQSEVEMLR	L18	726.686	MVTEMGSATVGGISPALSANAAK	E4; M5	699.398
			ISQWTNAIADAQSEVEMLR	M17	1089.53	MVTEMGSATVGGISPALSANAAK	M1; V10	818.093
			ISQWTNAIADAQSEVEMLR	M17	1089.53	MVTEMGSATVGGISPALSANAAK	M1; V10	766.08
			ISQWTNAIADAQSEVEMLR	M17	726.686	MVTEMGSATVGGISPALSANAAK	E4; V10	818.093
			ISQWTNAIADAQSEVEMLR	V15	1089.53	MVTEMGSATVGGISPALSANAAK	E4; V10	766.08
			ISQWTNAIADAQSEVEMLR	W4	1097.53	MVTEMGSATVGGISPALSANAAK	M5; V10	818.093
			ISQWTNAIADAQSEVEMLR	W4; A7	1097.53	MVTEMGSATVGGISPALSANAAK	M5; V10	766.08
			ISQWTNAIADAQSEVEMLR	W4; N6	1097.53	MVTEMGSATVGGISPALSANAAK	M1	818.096
			MVTEMGSATVGGISPALSANAAK	A8	1090.04	MVTEMGSATVGGISPALSANAAK	M1	818.093
			MVTEMGSATVGGISPALSANAAK	A8	727.029	MVTEMGSATVGGISPALSANAAK	M1	818.094
			MVTEMGSATVGGISPALSANAAK	E4	727.029	MVTEMGSATVGGISPALSANAAK	M1	699.398
			MVTEMGSATVGGISPALSANAAK	M1	1090.04	MVTEMGSATVGGISPALSANAAK	V2; E4	818.096
			MVTEMGSATVGGISPALSANAAK	M1	1090.04	MVTEMGSATVGGISPALSANAAK	V2; E4	818.093
			MVTEMGSATVGGISPALSANAAK	M1	1090.04	MVTEMGSATVGGISPALSANAAK	V2; E4	818.094
			MVTEMGSATVGGISPALSANAAK	M5	1090.04	MVTEMGSATVGGISPALSANAAK	V2; E4	699.398
			MVTEMGSATVGGISPALSANAAK	M5	727.029	MVTEMGSATVGGISPALSANAAK	M1; E4	818.096
			MVTEMGSATVGGISPALSANAAK	V10	727.029	MVTEMGSATVGGISPALSANAAK	M1; E4	818.093
			MVTEMGSATVGGISPALSANAAK	V2	1090.04	MVTEMGSATVGGISPALSANAAK	M1; E4	818.094
			MVTEMGSATVGGISPALSANAAK	V2	1090.04	MVTEMGSATVGGISPALSANAAK	M1; E4	699.398
			MVTEMGSATVGGISPALSANAAK	V2	727.031	MVTEMGSATVGGISPALSANAAK	V2; V10	818.093
			MVTEMGSATVGGISPALSANAAK	V2	1090.04	MVTEMGSATVGGISPALSANAAK	V2; V10	766.08
			VGLTQMVEQAVK	M6	659.857	MVTEMGSATVGGISPALSANAAK	M1; M5	818.096
			VGLTQMVEQAVK	M6	659.856	MVTEMGSATVGGISPALSANAAK	M1; M5	818.093
			VGLTQMVEQAVK	M6	659.856	MVTEMGSATVGGISPALSANAAK	M1; M5	818.094
			VGLTQMVEQAVK	V7	659.857	MVTEMGSATVGGISPALSANAAK	M1; M5	699.398
			VGLTQMVEQAVK	V7	659.856	MVTEMGSATVGGISPALSANAAK	M1; V2	818.096
						MVTEMGSATVGGISPALSANAAK	M1; V2	818.094
						MVTEMGSATVGGISPALSANAAK	M1; V2	699.398
						QDMESWYK	M3	495.966
						QDMESWYK	M3	680.326
						QDMESWYK	E4	495.966
						VGLTQMVEQAVK	V7	753.738
						VGLTQMVEQAVK	V7	802.391
						VGLTQMVEQAVK	M6	753.738
						VGLTQMVEQAVK	M6	802.391
Q21443	Lamin-1	lmn-1	TYQALLEGEEER	L5	726.341	QVDMTTYAK	M4	665.348
			TYQALLEGEEER	L5	726.342
			TYQALLEGEEER	L5	726.34
			TYQALLEGEEER	L5	726.342
O45319	Mitochondrial import inner membrane translocase subunit tim-13	tin-13	FMESWNLVSQTLQK	E3	863.93	FMESWNLVSQTLQK	N6	662.018
			FMESWNLVSQTLQK	F1	863.926	FMESWNLVSQTLQK	L7	662.018
			FMESWNLVSQTLQK	M2	863.926	FMESWNLVSQTLQK	W5	672.682
			FMESWNLVSQTLQK	M2; N6; L7	879.923	FMESWNLVSQTLQK	W5	672.682
			FMESWNLVSQTLQK	M2; N6; L7	879.929	FMESWNLVSQTLQK	W5	662.018
			FMESWNLVSQTLQK	M2; W5; N6	879.923	FMESWNLVSQTLQK	F1	672.682
			FMESWNLVSQTLQK	M2; W5; N6	879.929	FMESWNLVSQTLQK	F1; M2; E3	672.682
						FMESWNLVSQTLQK	F1; M2; E3	672.682
						FMESWNLVSQTLQK	F1; M2; L7	672.682
						FMESWNLVSQTLQK	F1; M2; N6	672.682
P19626	Myosin regulatory light chain 2	mlc-2	DLYASMGQIAPDSQIDAMIK	A17	1092.02	DLYASMGQIAPDSQIDAMIK	A4; M18	819.412
			DLYASMGQIAPDSQIDAMIK	A17	1092.03	DLYASMGQIAPDSQIDAMIK	M6; M18	819.413
			DLYASMGQIAPDSQIDAMIK	I19	1092.02	DLYASMGQIAPDSQIDAMIK	M6; M18	743.427
			DLYASMGQIAPDSQIDAMIK	I19	1092.03	DLYASMGQIAPDSQIDAMIK	M6; M18	1228.62
			DLYASMGQIAPDSQIDAMIK	I9	1092.02	DLYASMGQIAPDSQIDAMIK	M6; M18	819.412
			DLYASMGQIAPDSQIDAMIK	I9	1092.03	DLYASMGQIAPDSQIDAMIK	M6; M18	1228.62
			DLYASMGQIAPDSQIDAMIK	K20	1092.03	DLYASMGQIAPDSQIDAMIK	M6; M18	1228.62
			DLYASMGQIAPDSQIDAMIK	M18	1092.02	DLYASMGQIAPDSQIDAMIK	M6; M18	819.412
			DLYASMGQIAPDSQIDAMIK	M18	1092.03	DLYASMGQIAPDSQIDAMIK	M6; M18	819.414
			DLYASMGQIAPDSQIDAMIK	M6	1092.02	DLYASMGQIAPDSQIDAMIK	M6; I19	743.427
			DLYASMGQIAPDSQIDAMIK	M6	1092.03	DLYASMGQIAPDSQIDAMIK	M6; I19	1228.62
			DLYASMGQIAPDSQIDAMIK	Q8	1092.02	DLYASMGQIAPDSQIDAMIK	M6; I19	819.414
			DLYASMGQIAPDSQIDAMIK	Q8	1092.03	DLYASMGQIAPDSQIDAMIK	I9; A17	819.413
			LTGTDPEATIVGAFAMFDKK	A13	710.026	DLYASMGQIAPDSQIDAMIK	Q8; M18	819.413
			LTGTDPEATIVGAFAMFDKK	A15	710.026	DLYASMGQIAPDSQIDAMIK	Q8; M18	819.412
			LTGTDPEATIVGAFAMFDKK	A15	710.026	DLYASMGQIAPDSQIDAMIK	Q8; M18	819.412
			LTGTDPEATIVGAFAMFDKK	F14	710.026	DLYASMGQIAPDSQIDAMIK	Q8; M18	819.414
			LTGTDPEATIVGAFAMFDKK	M16	710.026	DLYASMGQIAPDSQIDAMIK	I9; M18	819.413
			LTGTDPEATIVGAFAMFDKK	M16	710.026	DLYASMGQIAPDSQIDAMIK	I9; M18	819.412
						DLYASMGQIAPDSQIDAMIK	I9; M18	819.412
						DLYASMGQIAPDSQIDAMIK	I9; M18	819.414
						DLYASMGQIAPDSQIDAMIK	M6; A17	819.413
						EAFGIMDQNK	M6	713.366
						EAFGIMDQNK	M6	713.366
						EAFGIMDQNK	M6	713.366
						EAFGIMDQNK	M6	713.366
						EAFGIMDQNK	M6	713.366
						EAFGIMDQNK	M6	475.913
						EAFGIMDQNK	M6	713.366
						EAFGIMDQNK	M6	805.452
						EAFGIMDQNK	M6	713.366
						EAFGIMDQNK	M6	713.367
						EAFGIMDQNKDGIIDK	M6	689.693
						EAFGIMDQNKDGIIDK	M6	766.081
						EAFGIMDQNKDGIIDK	M6	766.081
						EAFGIMDQNKDGIIDK	M6	766.081
						EAFGIMDQNKDGIIDK	M6	766.08
						EAFGIMDQNKDGIIDK	M6	766.08
						EAFGIMDQNKDGIIDK	M6	766.081
						EAFGIMDQNKDGIIDK	M6	664.429
						EAFGIMDQNKDGIIDK	M6	647.367
						EAFGIMDQNKDGIIDK	Q8	882.476
						EAFGIMDQNKDGIIDK	Q8	689.693
						EAFGIMDQNKDGIIDK	Q8	689.693
						EAFGIMDQNKDGIIDK	N9	882.476
						EAFGIMDQNKDGIIDK	N9	689.693
						EAFGIMDQNKDGIIDK	N9	689.693
						EAFGIMDQNKDGIIDK	N9	766.081
						EAFGIMDQNKDGIIDK	N9	647.367
						EAFGIMDQNKDGIIDK	D7	882.476
						EAFGIMDQNKDGIIDK	D7	689.693
						EAFGIMDQNKDGIIDK	D7	689.693
						EAFGIMDQNKDGIIDK	D7	689.692
						EAFGIMDQNKDGIIDK	D7	766.081
						EAFGIMDQNKDGIIDK	D7	766.08
						EAFGIMDQNKDGIIDK	D7	664.429
						EAFGIMDQNKDGIIDK	I13	766.08
						EAFGIMDQNKDGIIDK	I13	766.08
						EAFGIMDQNKDGIIDK	I13	664.429
						EAFGIMDQNKDGIIDK	I13	766.08
						EAFGIMDQNKDGIIDK	I13	766.081
						EAFGIMDQNKDGIIDK	K10	882.476
						EAFGIMDQNKDGIIDK	K10	689.693
						LTGTDPEATIVGAFAMFDK	M16	753.058
						LTGTDPEATIVGAFAMFDK	M16	753.06
						LTGTDPEATIVGAFAMFDKK	F14	872.145
						LTGTDPEATIVGAFAMFDKK	F14	872.146
						LTGTDPEATIVGAFAMFDKK	F14	872.146
						LTGTDPEATIVGAFAMFDKK	M16	613.355
						LTGTDPEATIVGAFAMFDKK	M16	872.145
						LTGTDPEATIVGAFAMFDKK	M16	872.144
						LTGTDPEATIVGAFAMFDKK	M16	872.146
						LTGTDPEATIVGAFAMFDKK	M16	872.146
						LTGTDPEATIVGAFAMFDKK	F17	613.355
						LTGTDPEATIVGAFAMFDKK	F17	872.145
						LTGTDPEATIVGAFAMFDKK	F17	872.144
						LTGTDPEATIVGAFAMFDKK	F17	872.146
						LTGTDPEATIVGAFAMFDKK	A15	872.145
						LTGTDPEATIVGAFAMFDKK	A15	872.145
						LTGTDPEATIVGAFAMFDKK	A15	872.146
						LTGTDPEATIVGAFAMFDKK	A13	872.145
						LTGTDPEATIVGAFAMFDKK	A13	872.146
						LTGTDPEATIVGAFAMFDKK	D18	613.355
						LTGTDPEATIVGAFAMFDKK	D18	872.145
						LTGTDPEATIVGAFAMFDKK	D18	872.146
						TIQEFKEAFGIMDQNK	M12	801.1
P53014	Myosin, essential light chain	mlc-3	AAGLKPTQAMVTK	A9	444.583	AAGLKPTQAMVTK	Q8	530.315
			AAGLKPTQAMVTK	M10	666.376	AAGLKPTQAMVTK	P6	530.315
			AAGLKPTQAMVTK	M10	444.583	AAGLKPTQAMVTK	V11	606.703
			AAGLKPTQAMVTK	V11	666.376	AAGLKPTQAMVTK	A9	530.314
			AAGLKPTQAMVTK	V11	444.583	AAGLKPTQAMVTK	M10	530.315
			LSADEADELLKGVEDGEGMVK	K21	741.023	AAGLKPTQAMVTK	M10	530.315
			LSADEADELLKGVEDGEGMVK	K21	741.023	AAGLKPTQAMVTK	M10	530.315
			LSADEADELLKGVEDGEGMVK	M19	741.023	AAGLKPTQAMVTK	M10	530.315
			LSADEADELLKGVEDGEGMVK	M19	741.024	AAGLKPTQAMVTK	M10	530.315
			LSADEADELLKGVEDGEGMVK	M19	1111.03	AAGLKPTQAMVTK	M10	606.702
			LSADEADELLKGVEDGEGMVK	M19	741.023	AAGLKPTQAMVTK	M10	606.702
			LSADEADELLKGVEDGEGMVK	V20	741.023	AAGLKPTQAMVTK	M10	606.703
			LSADEADELLKGVEDGEGMVK	V20	741.024	GVEDGEGMVK	M8	647.331
			LSADEADELLKGVEDGEGMVK	V20	741.023	GVEDGEGMVKYEDFIK	M8	874.494
			LTFEEWLPMYEQLAK	E4; E5	643.981	GVEDGEGMVKYEDFIK	M8	773.405
			LTFEEWLPMYEQLAK	E4; E5; M9	973.466	GVEDGEGMVKYEDFIK	M8	773.405
			LTFEEWLPMYEQLAK	E4; W6	643.981	GVEDGEGMVKYEDFIK	Y11	874.494
			LTFEEWLPMYEQLAK	E4; W6; M9	973.466	GVEDGEGMVKYEDFIK	V9	874.494
			LTFEEWLPMYEQLAK	E5; W6	643.981	GVEDGEGMVKYEDFIK	V9	773.405
			LTFEEWLPMYEQLAK	E5; W6	965.468	LSADEADELLKGVEDGEGMVK	M19	903.142
			LTFEEWLPMYEQLAK	E5; W6; M9	973.466	LSADEADELLKGVEDGEGMVK	M19	903.142
			LTFEEWLPMYEQLAK	E5; W6; M9	973.465	LSADEADELLKGVEDGEGMVK	M19	903.141
			LTFEEWLPMYEQLAK	E5; W6; Y10	973.465	LSADEADELLKGVEDGEGMVK	M19	503.332
			LTFEEWLPMYEQLAK	F3; E4	643.981	LSADEADELLKGVEDGEGMVK	M19	751.029
			LTFEEWLPMYEQLAK	F3; E4; M9	973.466	LSADEADELLKGVEDGEGMVK	M19	903.142
			LTFEEWLPMYEQLAK	F3; E5	643.981	LSADEADELLKGVEDGEGMVK	M19	903.142
			LTFEEWLPMYEQLAK	F3; E5; M9	973.466	LSADEADELLKGVEDGEGMVK	M19	903.143
			LTFEEWLPMYEQLAK	L1; E4	643.981	LSADEADELLKGVEDGEGMVK	M19	677.608
			LTFEEWLPMYEQLAK	L1; E5	643.981	LTFEEWLPMYEQLAK	E5; W6; Y10	735.044
			LTFEEWLPMYEQLAK	L1; F3	643.981	LTFEEWLPMYEQLAK	P8	724.381
			LTFEEWLPMYEQLAK	L7	957.472	LTFEEWLPMYEQLAK	P8	724.382
			LTFEEWLPMYEQLAK	L7	957.47	LTFEEWLPMYEQLAK	F3; E5; M9	735.044
			LTFEEWLPMYEQLAK	L7; P8	965.468	LTFEEWLPMYEQLAK	F3; E5; M9	735.045
			LTFEEWLPMYEQLAK	M9	957.473	LTFEEWLPMYEQLAK	E4; E5; Y10	735.045
			LTFEEWLPMYEQLAK	M9	957.473	LTFEEWLPMYEQLAK	E5; W6; M9	735.044
			LTFEEWLPMYEQLAK	M9	638.65	LTFEEWLPMYEQLAK	E5; W6; M9	735.045
			LTFEEWLPMYEQLAK	M9	957.472	LTFEEWLPMYEQLAK	E4; L7; M9	735.044
			LTFEEWLPMYEQLAK	M9	957.473	LTFEEWLPMYEQLAK	E4; L7; M9	735.045
			LTFEEWLPMYEQLAK	M9	957.473	LTFEEWLPMYEQLAK	F3; E4; M9	735.045
			LTFEEWLPMYEQLAK	M9	957.473	LTFEEWLPMYEQLAK	E4; W6; M9	735.044
			LTFEEWLPMYEQLAK	M9	957.472	LTFEEWLPMYEQLAK	E4; W6; M9	735.045
			LTFEEWLPMYEQLAK	M9	957.47	LTFEEWLPMYEQLAK	M9	724.381
			LTFEEWLPMYEQLAK	M9	957.47	LTFEEWLPMYEQLAK	M9	724.382
			LTFEEWLPMYEQLAK	M9	957.475	LTFEEWLPMYEQLAK	E4; W6; Y10	735.044
			LTFEEWLPMYEQLAK	P8	957.473	LTFEEWLPMYEQLAK	E4; W6; Y10	735.045
			LTFEEWLPMYEQLAK	P8	957.473	LTFEEWLPMYEQLAK	E4; E5; M9	735.044
			LTFEEWLPMYEQLAK	P8	957.472	LTFEEWLPMYEQLAK	E4; E5; M9	735.045
			LTFEEWLPMYEQLAK	P8	957.473	LTFEEWLPMYEQLAK	E5; L7; M9	735.044
			LTFEEWLPMYEQLAK	P8	957.473	LTFEEWLPMYEQLAK	E5; L7; M9	735.045
			LTFEEWLPMYEQLAK	P8	957.473
			LTFEEWLPMYEQLAK	P8	957.472
			LTFEEWLPMYEQLAK	P8	957.47
			LTFEEWLPMYEQLAK	P8	957.47
			LTFEEWLPMYEQLAK	P8	957.475
			LTFEEWLPMYEQLAK	W6	957.477
			LTFEEWLPMYEQLAK	W6	643.981
			LTFEEWLPMYEQLAK	W6	965.468
			LTFEEWLPMYEQLAK	W6	965.461
			LTFEEWLPMYEQLAK	W6; P8	965.468
P02567	Myosin-1	myo-1	LEQTLDEMEEAVER	E7	854.389	ENQIHSLQDEMNSQDETIGK	M11	863.748
			LEQTLDEMEEAVER	E9	854.389	ENQIHSLQDEMNSQDETIGK	M11	863.749
			LEQTLDEMEEAVER	M8	854.389	ENQIHSLQDEMNSQDETIGK	M11	863.749
			NMANEDQMAMIR	I11	720.307	ENQIHSLQDEMNSQDETIGK	M11	863.747
			NMANEDQMAMIR	I11	720.311	ENQIHSLQDEMNSQDETIGK	M11	422.925
			NMANEDQMAMIR	M10	720.307	ENQIHSLQDEMNSQDETIGK	M11	863.748
			NMANEDQMAMIR	M10	720.311	ENQIHSLQDEMNSQDETIGK	M11	863.747
			SSMDNLSEQIETLR	M3	819.883	ENQIHSLQDEMNSQDETIGK	M11	863.748
			SSNTELIGNNAALSAMK	K17	719.997	ENQIHSLQDEMNSQDETIGK	M11	863.748
			SSNTELIGNNAALSAMK	M16	719.997	ENQIHSLQDEMNSQDETIGK	E10	863.748
			VMDLQEALSAAQNK	M2	767.377	ENQIHSLQDEMNSQDETIGK	E10	863.749
			VMDLQEALSAAQNK	V1	767.377	ENQIHSLQDEMNSQDETIGK	E10	863.747
						ENQIHSLQDEMNSQDETIGK	E10	422.925
						ENQIHSLQDEMNSQDETIGK	E10	863.747
						ENQIHSLQDEMNSQDETIGK	E10	863.748
						ENQIHSLQDEMNSQDETIGK	Q8	716.38
						ENQIHSLQDEMNSQDETIGK	D9	863.748
						ENQIHSLQDEMNSQDETIGK	D9	863.747
						ENQIHSLQDEMNSQDETIGK	D9	422.925
						ENQIHSLQDEMNSQDETIGK	D9	863.747
						ENQIHSLQDEMNSQDETIGK	D9	863.748
						ENQIHSLQDEMNSQDETIGK	D9	716.38
						ENQIHSLQDEMNSQDETIGK	H5	863.748
						GQNVDQVHWAIGAMAK	M14	666.686
						NKDPLNDTVVSVMK	M13	688.059
						NKDPLNDTVVSVMK	M13	688.059
						SSNTELIGNNAALSAMK	A15	997.527
						SSNTELIGNNAALSAMK	A15	1083.59
						SSNTELIGNNAALSAMK	M16	583.336
						SSNTELIGNNAALSAMK	M16	997.527
						SSNTELIGNNAALSAMK	M16	1083.59
						SSNTELIGNNAALSAMK	M16	665.353
						SSNTELIGNNAALSAMK	K17	583.336
						VMDLQEALSAAQNK	L4	931.018
						VMDLQEALSAAQNK	Q5	931.018
						VMDLQEALSAAQNK	M2	859.479
						VMDLQEALSAAQNK	M2	737.074
						VMDLQEALSAAQNK	M2	931.018
						VMDLQEALSAAQNK	M2	895.981
						VMDLQEALSAAQNK	M2	895.98
						VMDLQEALSAAQNK	M2	895.981
						VMDLQEALSAAQNK	A7	1013.02
						VMDLQEALSAAQNK	A7	931.018
						VMDLQEALSAAQNK	V1	859.479
						VMDLQEALSAAQNK	V1	737.074
						VMDLQEALSAAQNK	V1	931.018
						VMDLQEALSAAQNK	V1	895.98
						VMDLQEALSAAQNK	V1	895.981
						VMDLQEALSAAQNK	D3	931.018
						VMDLQEALSAAQNK	E6	1013.02
						VMDLQEALSAAQNK	E6	931.018
						YMLQDHENQSMLITGESGAGK	M2; M11	866.751
						YMLQDHENQSMLITGESGAGK	M2; M11	866.751
						YMLQDHENQSMLITGESGAGK	Q4; M11	866.751
						YMLQDHENQSMLITGESGAGK	Q4; M11	866.751
						YMLQDHENQSMLITGESGAGK	M2; Q4	866.751
						YMLQDHENQSMLITGESGAGK	D5; M11	866.751
						YMLQDHENQSMLITGESGAGK	D5; M11	866.751
						YMLQDHENQSMLITGESGAGK	Y1; D5; E7	853.427
						YMLQDHENQSMLITGESGAGK	Y1; D5; E7	539.987
						YMLQDHENQSMLITGESGAGK	H6; M11	866.751
						YMLQDHENQSMLITGESGAGK	M2; N8	866.751
						YMLQDHENQSMLITGESGAGK	L3; M11	866.751
						YMLQDHENQSMLITGESGAGK	L3; M11	866.751
						YMLQDHENQSMLITGESGAGK	M2; Q9	866.751
						YMLQDHENQSMLITGESGAGK	Q4; Q9	866.751
						YMLQDHENQSMLITGESGAGK	M2	866.751
						YMLQDHENQSMLITGESGAGK	M2	866.751
						YMLQDHENQSMLITGESGAGK	Y1; M11	866.751
						YMLQDHENQSMLITGESGAGK	Y1; M11	866.751
						YMLQDHENQSMLITGESGAGK	M2; E7	866.751
						YMLQDHENQSMLITGESGAGK	M2; L12	866.751
						YNVLNWLEK	W6	734.406
						YNVLNWLEK	W6	780.448
						YNVLNWLEK	W6	734.405
						YNVLNWLEK	W6	734.406
						YNVLNWLEK	W6	734.406
						YNVLNWLEK	N5; W6	734.406
						YNVLNWLEK	N5; W6	734.405
						YNVLNWLEK	N5; W6	734.406
						YNVLNWLEK	N5; W6	734.406
P12845	Myosin-2	myo-2	LMQSLEDSEQTMER	L1	856.877	DVVQEMNPPKFEK	N7	688.381
			LMQSLEDSEQTMER	L1	856.881	DVVQEMNPPKFEK	M6	688.381
			LMQSLEDSEQTMER	M2	856.877	NMLQNHENQSMLITGESGAGK	Q4; M11	850.086
			LMQSLEDSEQTMER	M2	856.881	NMLQNHENQSMLITGESGAGK	Q4; M11	592.348
						NMLQNHENQSMLITGESGAGK	Q4; M11	850.084
						NMLQNHENQSMLITGESGAGK	Q4; M11	850.084
						NMLQNHENQSMLITGESGAGK	N5; M11	850.086
						NMLQNHENQSMLITGESGAGK	N5; M11	592.348
						NMLQNHENQSMLITGESGAGK	N5; M11	850.084
						NMLQNHENQSMLITGESGAGK	N5; M11	850.084
						NMLQNHENQSMLITGESGAGK	N1; L12	652.375
						NMLQNHENQSMLITGESGAGK	E7; M11	592.348
						NMLQNHENQSMLITGESGAGK	N8; M11	592.348
						NMLQNHENQSMLITGESGAGK	H6; I13	850.083
						NMLQNHENQSMLITGESGAGK	E7; I13	850.083
						NMLQNHENQSMLITGESGAGK	H6; M11	850.086
						NMLQNHENQSMLITGESGAGK	H6; M11	592.348
						NMLQNHENQSMLITGESGAGK	H6; M11	850.084
						NMLQNHENQSMLITGESGAGK	H6; M11	850.084
						NMLQNHENQSMLITGESGAGK	N1; M11	850.086
						NMLQNHENQSMLITGESGAGK	N1; M11	592.348
						NMLQNHENQSMLITGESGAGK	N1; M11	850.084
						NMLQNHENQSMLITGESGAGK	N1; M11	850.084
						NMLQNHENQSMLITGESGAGK	L3; L12	652.375
						NMLQNHENQSMLITGESGAGK	N8; I13	850.083
						NMLQNHENQSMLITGESGAGK	L3; M11	850.086
						NMLQNHENQSMLITGESGAGK	L3; M11	592.348
						NMLQNHENQSMLITGESGAGK	L3; M11	850.084
						NMLQNHENQSMLITGESGAGK	L3; M11	850.084
						NMLQNHENQSMLITGESGAGK	Q4; L12	652.375
						NMLQNHENQSMLITGESGAGK	M11	850.086
						NMLQNHENQSMLITGESGAGK	M11	592.348
						NMLQNHENQSMLITGESGAGK	M11	850.084
						NMLQNHENQSMLITGESGAGK	M11	850.084
						NMLQNHENQSMLITGESGAGK	Q9; M11	592.348
						NMLQNHENQSMLITGESGAGK	M2; L12	652.375
						NMLQNHENQSMLITGESGAGK	M2; M11	850.086
						NMLQNHENQSMLITGESGAGK	M2; M11	592.348
						NMLQNHENQSMLITGESGAGK	M2; M11	850.084
						NMLQNHENQSMLITGESGAGK	M2; M11	850.084
P12844	Myosin-3	myo-3	LEQQMDELEENIDR	M5	889.401	AGKEQEAMGELAVK	M8	655.037
			LEQQMDELEENIDR	M5	889.405	AGKEQEAMGELAVK	M8	655.036
			LMQDLDDAQSDVEK	L1	811.865	AGKEQEAMGELAVK	M8	655.036
			LMQDLDDAQSDVEK	L1	811.865	ALESMQATLEAETK	M5	897.971
			LMQDLDDAQSDVEK	M2	811.865	ALESMQATLEAETK	M5	897.972
			LMQDLDDAQSDVEK	M2	811.865	EQEAMGELAVK	M5	739.392
			LSDITGQLEDMQER	M11	825.887	EQEAMGELAVK	M5	739.393
						FKLMQDLDDAQSDVEK	L7	795.419
						FKLMQDLDDAQSDVEK	D6	795.419
						FKLMQDLDDAQSDVEK	Q5	795.419
						FKLMQDLDDAQSDVEK	F1	795.419
						FKLMQDLDDAQSDVEK	L3	795.419
						GGTLEEQIVQTNPVLEAFGNAK	E6	848.803
						GGTLEEQIVQTNPVLEAFGNAK	E6	848.802
						GGTLEEQIVQTNPVLEAFGNAK	E5	848.803
						GGTLEEQIVQTNPVLEAFGNAK	E5	848.802
						LMQDLDDAQSDVEK	M2	940.463
						LMQDLDDAQSDVEK	M2	940.461
						LMQDLDDAQSDVEK	L1	940.463
						LMQDLDDAQSDVEK	L1	940.461
						QFESIIAEWK	E8; W9	770.417
						QFESIIAEWK	E8; W9	662.359
						QFESIIAEWK	E8; W9	1020.58
						QFESIIAEWK	E8; W9	770.417
						QFESIIAEWK	W9	864.477
						QFESIIAEWK	W9	770.417
						QFESIIAEWK	W9	662.359
						QFESIIAEWK	W9	1020.58
						QFESIIAEWK	W9	770.417
						QFESIIAEWK	A7; W9	770.417
						QFESIIAEWK	A7; W9	662.359
						QFESIIAEWK	A7; W9	1020.58
						QFESIIAEWK	A7; W9	770.417
						SLQDEMANQDEAVAK	Q3	641.317
						SLQDEMANQDEAVAK	M6	961.473
						SLQDEMANQDEAVAK	D4	641.317
						SLQDEMANQDEAVAK	L2	641.317
P02566	Myosin-4	unc-54	ALESMQASLETEAK	M5	762.367	ALESMQASLETEAK	L2	594.312
			ALESMQASLETEAK	M5	762.368	ALESMQASLETEAK	Q6	890.962
			ALESMQASLETEAK	M5	762.368	ALESMQASLETEAK	Q6	890.964
			ALESMQASLETEAK	M5	762.366	ALESMQASLETEAK	Q6	890.964
			ALESMQASLETEAK	M5	762.37	ALESMQASLETEAK	Q6	890.963
			ALESMQASLETEAK	M5	762.367	ALESMQASLETEAK	Q6	890.964
			ALESMQASLETEAK	M5	762.367	ALESMQASLETEAK	Q6	594.312
			ALESMQASLETEAK	Q6	762.367	ALESMQASLETEAK	Q6	890.964
			DLEEANMNHENQLGGLR	A5	1063.02	ALESMQASLETEAK	Q6	890.963
			DLEEANMNHENQLGGLR	A5	652.635	ALESMQASLETEAK	M5	890.962
			DLEEANMNHENQLGGLR	H9	978.45	ALESMQASLETEAK	M5	890.964
			DLEEANMNHENQLGGLR	M7	652.634	ALESMQASLETEAK	M5	890.964
			DLEEANMNHENQLGGLR	M7	652.634	ALESMQASLETEAK	M5	890.963
			DLEEANMNHENQLGGLR	M7	1063.02	ALESMQASLETEAK	M5	890.964
			DLEEANMNHENQLGGLR	M7	978.45	ALESMQASLETEAK	M5	594.312
			DLEEANMNHENQLGGLR	M7	652.636	ALESMQASLETEAK	M5	890.964
			DLEEANMNHENQLGGLR	M7	652.635	ALESMQASLETEAK	M5	890.963
			DLEEANMNHENQLGGLR	M7	978.452	ALESMQASLETEAK	A1	594.312
			DLEEANMNHENQLGGLR	M7	652.635	ALESMQASLETEAK	A7	594.312
			DLEEANMNHENQLGGLR	N6	652.634	ALESMQASLETEAK	E3	594.312
			DLEEANMNHENQLGGLR	N6	652.634	ANADIQQWK	W8	681.864
			DLEEANMNHENQLGGLR	N6	1063.02	ANADIQQWK	Q7; W8	681.864
			DLEEANMNHENQLGGLR	N6	978.45	DLEEANMNHENQLGGLRK	N11	781.064
			DLEEANMNHENQLGGLR	N6	652.636	DLEEANMNHENQLGGLRK	N8	781.064
			DLEEANMNHENQLGGLR	N6	978.452	DLEEANMNHENQLGGLRK	N8	781.063
			DLEEANMNHENQLGGLR	N6	652.635	DLEEANMNHENQLGGLRK	N6	781.064
			DLEEANMNHENQLGGLR	N8	978.45	DLEEANMNHENQLGGLRK	N6	781.064
			QIQDLEMSLR	E6	624.814	DLEEANMNHENQLGGLRK	N6	781.064
			QIQDLEMSLR	M7	624.814	DLEEANMNHENQLGGLRK	N6	781.063
			QIQDLEMSLR	M7	624.814	DLEEANMNHENQLGGLRK	A5	781.064
			SLQDEMQQQDEAIAK	D4	875.401	DLEEANMNHENQLGGLRK	A5	781.064
			SLQDEMQQQDEAIAK	E5	875.401	DLEEANMNHENQLGGLRK	Q12	781.064
			SLQDEMQQQDEAIAK	M6	875.405	DLEEANMNHENQLGGLRK	H9	781.064
			SLQDEMQQQDEAIAK	M6	875.403	DLEEANMNHENQLGGLRK	M7	781.064
			SLQDEMQQQDEAIAK	M6	875.401	DLEEANMNHENQLGGLRK	M7	781.064
			SLQDEMQQQDEAIAK	M6	875.404	DLEEANMNHENQLGGLRK	M7	781.064
			SLQDEMQQQDEAIAK	Q7	875.405	DLEEANMNHENQLGGLRK	M7	781.063
			SLQDEMQQQDEAIAK	Q7	875.401	ELVQEMNPPK	M6	729.398
			SLQDEMQQQDEAIAK	Q8	875.401	ELVQEMNPPKFEK	Q4	697.724
						ELVQEMNPPKFEK	E5	615.369
						ELVQEMNPPKFEK	E5	697.724
						ELVQEMNPPKFEK	M6	697.723
						ELVQEMNPPKFEK	M6	615.369
						ELVQEMNPPKFEK	M6	697.723
						ELVQEMNPPKFEK	M6	697.724
						ELVQEMNPPKFEK	M6	860.432
						ELVQEMNPPKFEK	M6	697.724
						ELVQEMNPPKFEK	M6	697.723
						ELVQEMNPPKFEK	N7	697.724
						ELVQEMNPPKFEK	N7	697.723
						ESLNNLMTMLNK	M7; M9	848.944
						ESLNNLMTMLNK	M7; M9	848.946
						ESLNNLMTMLNK	M7; M9	848.945
						ESLNNLMTMLNK	M7; M9	848.945
						ESLNNLMTMLNK	M7; M9	848.944
						ESLNNLMTMLNK	M7; M9	566.299
						ESLNNLMTMLNK	M7; M9	848.943
						ESLNNLMTMLNK	M7; M9	848.942
						ESLNNLMTMLNK	M7; M9	848.943
						ESLNNLMTMLNK	M7; M9	566.298
						ESLNNLMTMLNK	M7; M9	1013.02
						ESLNNLMTMLNK	M9; L10	848.944
						ESLNNLMTMLNK	M9; L10	848.946
						ESLNNLMTMLNK	M9; L10	848.943
						ESLNNLMTMLNK	M9; L10	848.942
						ESLNNLMTMLNK	M9; L10	1013.02
						ESLNNLMTMLNK	M9	848.944
						ESLNNLMTMLNK	M9	848.946
						ESLNNLMTMLNK	M9	848.945
						ESLNNLMTMLNK	M9	848.945
						ESLNNLMTMLNK	M9	848.944
						ESLNNLMTMLNK	M9	848.943
						ESLNNLMTMLNK	M9	848.942
						ESLNNLMTMLNK	M9	848.943
						ESLNNLMTMLNK	M9	1013.02
						ESLNNLMTMLNK	M9	840.947
						ESLNNLMTMLNK	M9	840.946
						ESLNNLMTMLNK	E1; M9	566.298
						ESLNNLMTMLNK	E1; M9	566.299
						ESLNNLMTMLNK	E1; M9	943.15
						ESLNNLMTMLNK	E1; M9	566.299
						ESLNNLMTMLNK	E1; L10	566.299
						ESLNNLMTMLNK	E1; L10	943.15
						ESLNNLMTMLNK	E1; L10	566.299
						ESLNNLMTMLNK	M7	848.944
						ESLNNLMTMLNK	M7	848.945
						ESLNNLMTMLNK	M7	848.945
						ESLNNLMTMLNK	M7	848.944
						ESLNNLMTMLNK	M7	1013.02
						LMEDLQSEEDK	M2	805.395
						LMEDLQSEEDK	M2	805.396
						LMEDLQSEEDK	L1	805.395
						LMEDLQSEEDK	L1	805.396
						LMEDLQSEEDKGNHQNK	L1	630.071
						LMEDLQSEEDKGNHQNK	L1	630.072
						LMEDLQSEEDKGNHQNK	L1	630.072
						LMEDLQSEEDKGNHQNK	L1	630.072
						LMEDLQSEEDKGNHQNK	L1	630.072
						LMEDLQSEEDKGNHQNK	L1	582.822
						LMEDLQSEEDKGNHQNK	L1	630.072
						LMEDLQSEEDKGNHQNK	M2	630.071
						LMEDLQSEEDKGNHQNK	M2	630.072
						LMEDLQSEEDKGNHQNK	M2	630.072
						LMEDLQSEEDKGNHQNK	M2	630.072
						LMEDLQSEEDKGNHQNK	M2	630.072
						LMEDLQSEEDKGNHQNK	M2	582.822
						LMEDLQSEEDKGNHQNK	M2	630.072
						LMEDLQSEEDKGNHQNK	E3	630.072
						LMEDLQSEEDKGNHQNK	E3	630.072
						LMEDLQSEEDKGNHQNK	E3	630.072
						NKDPLNDTVVSAMK	V10	767.4
						NKDPLNDTVVSAMK	M13	767.4
						NKDPLNDTVVSAMK	M13	602.326
						NKDPLNDTVVSAMK	M13	920.133
						NKDPLNDTVVSAMK	M13	678.714
						NKDPLNDTVVSAMK	M13	463.252
						NKDPLNDTVVSAMK	M13	678.715
						NKDPLNDTVVSAMK	M13	678.715
						NKDPLNDTVVSAMK	M13	678.715
						NKDPLNDTVVSAMK	M13	659.351
						NKDPLNDTVVSAMK	M13	678.713
						NKDPLNDTVVSAMK	M13	678.715
						NKDPLNDTVVSAMK	A12	767.4
						NKDPLNDTVVSAMK	A12	602.326
						NKDPLNDTVVSAMK	K14	767.4
						NKDPLNDTVVSAMK	K14	602.326
						NMLQDHENQSMLITGESGAGK	N8	845.079
						NMLQDHENQSMLITGESGAGK	N8	845.078
						NMLQDHENQSMLITGESGAGK	M2; Q9	600.989
						NMLQDHENQSMLITGESGAGK	M2; Q9	810.904
						NMLQDHENQSMLITGESGAGK	M2; Q9	450.279
						NMLQDHENQSMLITGESGAGK	D5	845.08
						NMLQDHENQSMLITGESGAGK	D5	845.079
[truncated: 1,612 more rows]
